# Supplementary material for: Trycycler: consensus long-read assemblies for bacterial genomes
Source: PubMed Central journal article supplement (PMC8442456; doi:10.1186/s13059-021-02483-z), 2021-09-14
Supplement: 13059_2021_2483_MOESM2_ESM.pdf [file 13059_2021_2483_MOESM2_ESM.pdf]

The **References** worksheet contains the list of NCBI reference genomes, sorted number of genomes per species. References from the top 10 species are highlighted and were used as the genomes in the simulated read tests.

The **Genomes** worksheet contains information about the reference genomes that were used to generate the reads and as the ground truth against which assemblies were compared.

The **Read simulation** worksheet contains descriptions of the parameters used to generate Nanopore reads (made by Badread) and Illumina reads (made by ART).

The **Reads** worksheet contains summaries of the input read sets for each of the ten genomes. This includes both simulated Nanopore reads (made by Badread) and simulated Illumina reads (made by ART).

The **Assemblies** worksheet contains basic descriptions of each of the assemblies for each genome and computational stats.

The **Flye circularisation** worksheet shows the circularisation error in Flye assemblies (missing or duplicated bases at the start/end of contigs) which were manually fixed for the 'Flye (fixed circ)' assemblies.

The **Comparisons** worksheet contains chromosome identity values for each of the assemblies. These were based on an assembly-to-reference alignment of the chromosomal contig for each assembly. For Flye, values are given for both unaltered Flye assemblies ('Flye') and Flye assemblies where circularisation issue have been manually fixed ('Flye (fixed circ)').

The **Repeat identities** worksheet contains the sequence identities of all assemblies for both repeat and non-repeat regions of the genome. Identities are expressed both as percentages and a Q-scores.

# References

| #Species/Genus                     | Genomes | Organism name                                                    | RefSeq accession | Chromosome RefSeq        | Chromosome GenBank     |
|------------------------------------|---------|------------------------------------------------------------------|------------------|--------------------------|------------------------|
| Escherichia coli                   | 15316   | Escherichia coli str. K-12 substr. MG1655                        | GCF_00000845.2   | NC_000913.3              | U00096.3               |
| Escherichia coli                   | 15316   | Escherichia coli O157:H7 str. Sakai                              |                  | NC_002695.2              | BA000007.3             |
| Escherichia coli                   | 15316   | Escherichia coli IA139                                           |                  | NC_011750.1              | CU928164.2             |
| Escherichia coli                   | 15316   | Escherichia coli UMN026                                          |                  | NC_011751.1              | CU928163.2             |
| Escherichia coli                   | 15316   | Escherichia coli O83:H1 str. NRG 857C                            |                  | NC_017634.1              | CP001855.1             |
| Escherichia coli                   | 15316   | Escherichia coli O104:H4 str. 2011C-3493                         |                  | NC_018658.1              | CP003289.1             |
| Salmonella enterica                | 13751   | Salmonella enterica subsp. enterica serovar Typhimurium str. LT2 | GCF_000006945.2  | NC_003197.2              | AE006468.2             |
| Salmonella enterica                | 13751   | Salmonella enterica subsp. enterica serovar Typhi str. CT18      |                  | NC_005198.1              | AM180355.1             |
| Staphylococcus aureus              | 10287   | Staphylococcus aureus subsp. aureus NCTC 8325                    | GCF_000013425.1  | NC_007795.1              | CP000253.1             |
| Streptococcus pneumoniae           | 8448    | Streptococcus pneumoniae R6                                      | GCF_000007045.1  | NC_003098.1              | AE007317.1             |
| Klebsiella pneumoniae              | 6815    | Klebsiella pneumoniae subsp. pneumoniae HS11286                  | GCF_000240185.1  | NC_016845.1              | CP003200.1             |
| Mycobacterium tuberculosis         | 6456    | Mycobacterium tuberculosis H37Rv                                 | GCF_000195955.2  | NC_000962.3              | AL123456.3             |
| Mycobacterium tuberculosis         | 6456    | Mycobacterium tuberculosis variant bovis AF2122/97               |                  | NC_002945.4              | LT708304.1             |
| Pseudomonas aeruginosa             | 4107    | Pseudomonas aeruginosa PAO1                                      | GCF_000006765.1  | NC_002516.2              | AE004091.2             |
| Listeria monocytogenes             | 3784    | Listeria monocytogenes EGD-e                                     | GCF_000196035.1  | NC_003210.1              | AL591824.1             |
| Neisseria meningitidis             | 1938    | Neisseria meningitidis MC58                                      | GCF_000008805.1  | NC_003112.2              | AE002098.2             |
| Campylobacter jejuni               | 1753    | Campylobacter jejuni subsp. jejuni NCTC 11168 = ATCC 700819      | GCF_000009085.1  | NC_002163.1              | AL111168.1             |
| Mycobacteroides abscessus          | 1614    | Mycobacteroides abscessus ATCC 19977                             | GCF_000069185.1  | NC_010397.1              | CU458896.1             |
| Burkholderia pseudomallei          | 1533    | Burkholderia pseudomallei K96243                                 | GCF_000011545.1  | NC_006350.1, NC_006351.1 | BX571965.1, BX571966.1 |
| Clostridioides difficile           | 1445    | Clostridioides difficile 630                                     | GCF_000009205.2  | NC_005089.1              | AM180355.1             |
| Enterococcus faecium               | 1344    | Enterococcus faecium DO                                          | GCF_000174395.2  | NC_017960.1              | CP003583.1             |
| Helicobacter pylori                | 1338    | Helicobacter pylori 26695                                        | GCF_000008525.1  | NC_000915.1              | AE000511.1             |
| Streptococcus suis                 | 1280    | Streptococcus suis BM407                                         | GCF_000026745.1  | NC_012926.1              | FM252032.1             |
| Streptococcus agalactiae           | 1110    | Streptococcus agalactiae 2603V/R                                 | GCA_000007265.1  | NC_004416.1              | AE009948.1             |
| Bacillus cereus                    | 1016    | Bacillus cereus ATCC 14579                                       | GCF_000007825.1  | NC_004722.1              | AE016877.1             |
| Vibrio cholerae                    | 1002    | Vibrio cholerae O1 biovar El Tor str. N16961                     | GCF_000006745.1  | NC_002505.1, NC_002506.1 | AE003852.1, AE003853.1 |
| Enterococcus faecalis              | 880     | Enterococcus faecalis V583                                       | GCF_000007785.1  | NC_004668.1              | AE016830.1             |
| Vibrio parahaemolyticus            | 872     | Vibrio parahaemolyticus RIMD 2210633                             |                  | NC_004605.1, NC_004603.1 | BA000032.2, BA000031.2 |
| Bordetella pertussis               | 765     | Bordetella pertussis Tohama I                                    |                  | NC_002929.2              | BX470248.1             |
| Haemophilus influenzae             | 703     | Haemophilus influenzae Rd KW20                                   |                  | NC_000907.1              | LA2023.1               |
| Legionella pneumophila             | 638     | Legionella pneumophila subsp. pneumophila str. Philadelphia 1    |                  | NC_002942.5              | AE017354.1             |
| Neisseria gonorrhoeae              | 573     | Neisseria gonorrhoeae FA 1090                                    |                  | NC_002946.2              | AE004969.1             |
| Staphylococcus epidermidis         | 553     | Staphylococcus epidermidis ATCC 12228                            |                  | NC_004461.1              | AE015929.1             |
| Shigella flexneri                  | 540     | Shigella flexneri 2a str. 301                                    |                  | NC_004337.2              | AE005674.2             |
| Enterobacter cloacae               | 512     | Enterobacter cloacae subsp. cloacae ATCC 13047                   |                  | NC_014121.1              | CP001918.1             |
| Bacillus thuringiensis             | 499     | [Bacillus thuringiensis] serovar konkukian str. 97-27            |                  | NC_005957.1              | AE017355.1             |
| Streptococcus pyogenes             | 489     | Streptococcus pyogenes M1 GAS                                    |                  | NC_002737.2              | AE004092.2             |
| Pseudomonas syringae               | 386     | Pseudomonas syringae pv. syringae B728a                          |                  | NC_007005.1              | CP000075.1             |
| Yersinia pestis                    | 378     | Yersinia pestis CO92                                             |                  | NC_003143.1              | AL590842.1             |
| Lactobacillus plantarum            | 345     | Lactobacillus plantarum WCFS1                                    |                  | NC_004567.2              | AL935263.2             |
| Leptospira interrogans             | 297     | Leptospira interrogans serovar Lai str. 56601                    |                  | NC_004343.2, NC_004342.2 | AE010301.2, AE010300.2 |
| Bacillus subtilis                  | 252     | Bacillus subtilis subsp. subtilis str. 168                       |                  | NC_000964.3              | AL009126.3             |
| Clostridium botulinum              | 242     | Clostridium botulinum A str. ATCC 3502                           |                  | NC_009495.1              | AM412317.1             |
| Clostridium botulinum              | 242     | Clostridium botulinum A str. Hall                                |                  | NC_009698.1              | CP000727.1             |
| Francisella tularensis             | 235     | Francisella tularensis subsp. tularensis SCHU 54                 |                  | NC_006570.2              | AJ749949.2             |
| Bacillus anthracis                 | 233     | Bacillus anthracis str. Ames                                     |                  | NC_003997.3              | AE016879.1             |
| Bacillus anthracis                 | 233     | Bacillus anthracis str. Sterne                                   |                  | NC_005945.1              | AE017225.1             |
| Klebsiella aerogenes               | 210     | Klebsiella aerogenes KCTC 2190                                   |                  | NC_015663.1              | CP002824.1             |
| Sinorhizobium meliloti             | 204     | Sinorhizobium meliloti 1021                                      |                  | NC_003047.1              | ALS91688.1             |
| Acinetobacter pittii               | 202     | Acinetobacter pittii PHEA-2                                      |                  | NC_016603.1              | CP002177.1             |
| Streptococcus mutans               | 194     | Streptococcus mutans UA159                                       |                  | NC_004350.2              | AE014133.2             |
| Bifidobacterium longum             | 189     | Bifidobacterium longum NCC2705                                   |                  | NC_004307.2              | AE014295.3             |
| Yersinia enterocolitica            | 181     | Yersinia enterocolitica subsp. enterocolitica 8081               |                  | NC_008800.1              | AM286415.1             |
| Lactococcus lactis                 | 180     | Lactococcus lactis subsp. lactis I1403                           |                  | NC_002662.1              | AE005176.1             |
| Chlamydia trachomatis              | 176     | Chlamydia trachomatis D/UW-3/CX                                  |                  | NC_000117.1              | AE001273.1             |
| Chlamydia trachomatis              | 176     | Chlamydia trachomatis 434/Bu                                     |                  | NC_010287.1              | AM884176.1             |
| Bacteroides fragilis               | 160     | Bacteroides fragilis YCH46                                       |                  | NC_006347.1              | AP006841.1             |
| Lactobacillus paracasei            | 157     | Lactobacillus paracasei ATCC 334                                 |                  | NC_008526.1              | CP000423.1             |
| Pseudomonas putida                 | 118     | Pseudomonas putida KT2440                                        |                  | NC_002947.4              | AE015451.2             |
| Borrelia burgdorferi               | 111     | Borrelia burgdorferi B31                                         |                  | NC_001318.1              | AE000783.1             |
| Gardnerella vaginalis              | 104     | Gardnerella vaginalis ATCC 14019                                 |                  | NC_014644.1              | CP002104.1             |
| Xanthomonas campestris             | 94      | Xanthomonas campestris pv. campestris str. ATCC 33913            |                  | NC_003902.1              | AE008922.1             |
| Streptococcus mitis                | 91      | Streptococcus mitis B6                                           |                  | NC_013853.1              | FN568063.1             |
| Bordetella bronchiseptica          | 91      | Bordetella bronchiseptica 253                                    |                  | NC_019382.1              | HE965806.1             |
| Mycoplasma pneumoniae              | 89      | Mycoplasma pneumoniae M129                                       |                  | NC_000912.1              | U00089.2               |
| Lactobacillus salivarius           | 84      | Lactobacillus salivarius UCC118                                  |                  | NC_007929.1              | CP000233.1             |
| Burkholderia mallei                | 83      | Burkholderia mallei ATCC 23344                                   |                  | NC_006349.2, NC_006348.1 | CP000011.2, CP000010.1 |
| Aeromonas hydrophila               | 73      | Aeromonas hydrophila subsp. hydrophila ATCC 7966                 |                  | NC_008570.1              | CP000462.1             |
| Flavobacterium psychrophilum       | 73      | Flavobacterium psychrophilum JIP02/86                            |                  | NC_009613.3              | AM398681.2             |
| Shigella dysenteriae               | 72      | Shigella dysenteriae Sd197                                       |                  | NC_007606.1              | CP000034.1             |
| Bifidobacterium bifidum            | 69      | Bifidobacterium bifidum PRL2010                                  |                  | NC_014638.1              | CP001840.1             |
| Coxiella burnetii                  | 68      | Coxiella burnetii RSA 493                                        |                  | NC_002971.4              | AE016828.3             |
| Fusobacterium nucleatum            | 68      | Fusobacterium nucleatum subsp. nucleatum ATCC 25586              |                  | NC_003454.1              | AE009915.2             |
| Pseudomonas syringae group ge      | 68      | Pseudomonas syringae pv. tomato str. DC3000                      |                  | NC_004578.1              | AE016853.1             |
| Streptococcus sanguinis            | 62      | Streptococcus sanguinis SK36                                     |                  | NC_009009.1              | CP000387.1             |
| Prochlorococcus marinus            | 48      | Prochlorococcus marinus subsp. marinus str. CCMP1375             |                  | NC_005042.1              | AE017126.1             |
| Sinorhizobium medicae              | 42      | Sinorhizobium medicae WSM419                                     |                  | NC_009636.1              | CP000738.1             |
| Corynebacterium glutamicum         | 39      | Corynebacterium glutamicum ATCC 13032                            |                  | NC_003450.3              | BA000036.3             |
| Lactobacillus acidophilus          | 39      | Lactobacillus acidophilus NCFM                                   |                  | NC_006814.3              | CP000033.3             |
| Bacteroides thetaiotaomicron       | 35      | Bacteroides thetaiotaomicron VPI-5482                            |                  | NC_004663.1              | AE015928.1             |
| Alliivibrio fischeri               | 34      | Alliivibrio fischeri E5114                                       |                  | NC_006840.2, NC_006841.2 | CP000020.2, CP000021.2 |
| Buchnera aphidicola                | 30      | Buchnera aphidicola str. APS (Acyrtosiphon pisum)                |                  | NC_002528.1              | BA000003.2             |
| Mycoplasma mycoides                | 23      | Mycoplasma mycoides subsp. mycoides SC str. PG1                  |                  | NC_005364.2              | BX293980.2             |
| Rhodobacter sphaeroides            | 21      | Rhodobacter sphaeroides 2.4.1                                    |                  | NC_007494.2, NC_007493.2 | CP000144.2, CP000143.2 |
| Bordetella parapertussis           | 21      | Bordetella parapertussis Bpp5                                    |                  | NC_018628.1              | HE965803.1             |
| Sinorhizobium fredii               | 19      | Sinorhizobium fredii NGF224                                      |                  | NC_014318.1              | CP001389.1             |
| Treponema denticola                | 17      | Treponema denticola ATCC 35405                                   |                  | NC_002967.9              | AE017226.1             |
| Chlamydia pneumoniae               | 13      | Chlamydia pneumoniae CWL029                                      |                  | NC_000922.1              | AE001363.1             |
| Rickettsia prowazekii              | 13      | Rickettsia prowazekii str. Madrid E                              |                  | NC_000963.1              | AJ235269.1             |
| Mesoplasma florum                  | 12      | Mesoplasma florum L1                                             |                  | NC_006055.1              | AE017263.1             |
| Moorella thermoacetica             | 12      | Moorella thermoacetica ATCC 39073                                |                  | NC_007644.1              | CP000232.1             |
| Caulobacter vibrioides             | 11      | Caulobacter vibrioides CB15                                      |                  | NC_002696.2              | AE005673.1             |
| Salinibacter ruber                 | 11      | Salinibacter ruber DSM 13855                                     |                  | NC_007677.1              | CP000159.1             |
| Caulobacter vibrioides             | 11      | Caulobacter vibrioides NA1000                                    |                  | NC_011916.1              | CP001340.1             |
| Clostridium acetobutylicum         | 10      | Clostridium acetobutylicum ATCC 824                              |                  | NC_003030.1              | AE001437.1             |
| Thermus thermophilus               | 10      | Thermus thermophilus HB8                                         |                  | NC_006461.1              | AP008226.1             |
| Bradyrhizobium diazoefficiens      | 9       | Bradyrhizobium diazoefficiens USDA 110                           |                  | NC_004463.1              | BA000040.2             |
| Mycobacterium smegmatis            | 9       | Mycobacterium smegmatis MC2 155                                  |                  | NC_008596.1              | CP000480.1             |
| Amicycolopsis mediterranei         | 7       | Amicycolopsis mediterranei U32                                   |                  | NC_014318.1              | CP002000.1             |
| Thermotoga maritima                | 6       | Thermotoga maritima MS8                                          |                  | NC_000853.1              | AE000512.1             |
| Mycobacterium leprae               | 6       | Mycobacterium leprae TN                                          |                  | NC_002677.1              | AL450380.1             |
| Geobacter sulfurreducens           | 6       | Geobacter sulfurreducens PCA                                     |                  | NC_002939.5              | AE017180.2             |
| Agrobacterium fabrum               | 6       | Agrobacterium fabrum str. C58                                    |                  | NC_003063.2, NC_003062.2 | AE007870.2, AE007869.2 |
| Rhodopirellula baltica             | 6       | Rhodopirellula baltica SH 1                                      |                  | NC_005027.1              | BX119912.1             |
| Mesorhizobium ciceri               | 6       | Mesorhizobium ciceri biovar biserrulae WSM1271                   |                  | NC_014923.1              | CP002447.1             |
| Deinococcus radiodurans            | 5       | Deinococcus radiodurans R1                                       |                  | NC_001263.1, NC_001264.1 | AE000513.1, AE001825.1 |
| Ketogulonicigenium vulgare         | 5       | Ketogulonicigenium vulgare WSH-001                               |                  | NC_017384.1              | CP002018.1             |
| Desulfovibrio vulgaris             | 4       | Desulfovibrio vulgaris str. Hildenborough                        |                  | NC_002937.3              | AE017285.1             |
| Rhodospirillum rubrum              | 4       | Rhodospirillum rubrum ATCC 11170                                 |                  | NC_007643.1              | CP000230.1             |
| Chloroflexus aurantiacus           | 3       | Chloroflexus aurantiacus J-10-f                                  |                  | NC_010175.1              | CP000909.1             |
| Brachybacillus faecium             | 3       | Brachybacillus faecium DSM 4810                                  |                  | NC_013172.1              | CP001643.1             |
| Thermosynechococcus elongatus      | 2       | Thermosynechococcus elongatus BP-1                               |                  | NC_004113.1              | BA000039.2             |
| Shewanella oneidensis              | 2       | Shewanella oneidensis MR-1                                       |                  | NC_004347.2              | AE014299.2             |
| Dictyoglomus turgidum              | 2       | Dictyoglomus turgidum DSM 6724                                   |                  | NC_011661.1              | CP001251.1             |
| Aquifex aeolicus                   | 1       | Aquifex aeolicus VF5                                             |                  | NC_000918.1              | AE000657.1             |
| Chlorobaculum tepidum              | 1       | Chlorobaculum tepidum TLS                                        |                  | NC_002932.3              | AE006470.1             |
| Streptomyces coelicolor            | 1       | Streptomyces coelicolor A3(2)                                    |                  | NC_003888.3              | AL645882.2             |
| Gloeobacter violaceus              | 1       | Gloeobacter violaceus PCC 7421                                   |                  | NC_005125.1              | BA000045.2             |
| Thermodesulfobacterium yellowstoni | 1       | Thermodesulfobacterium yellowstoni DSM 11347                     |                  | NC_011296.1              | CP001147.1             |
| Thermanaerovibrio acidaminovos     | 1       | Thermanaerovibrio acidaminovos DSM 6589                          |                  | NC_013522.1              | CP001818.1             |

# Genomes

| Species                           | RefSeq accession | Genome size | Replicons | Longest repeat |             |
|-----------------------------------|------------------|-------------|-----------|----------------|-------------|
|                                   |                  |             |           | From Unicycler | From MUMmer |
| <i>Campylobacter jejuni</i>       | GCF_000009085.1  | 1,641,481   | 1         | 21,305         | 6,101       |
| <i>Escherichia coli</i>           | GCF_000005845.2  | 4,641,652   | 1         | 6,772          | 5,463       |
| <i>Klebsiella pneumoniae</i>      | GCF_000240185.1  | 5,682,322   | 7         | 7,036          | 9,161       |
| <i>Listeria monocytogenes</i>     | GCF_000196035.1  | 2,944,528   | 1         | 14,849         | 5,934       |
| <i>Mycobacterium tuberculosis</i> | GCF_000195955.2  | 4,411,532   | 1         | 10,195         | 2,441       |
| <i>Neisseria meningitidis</i>     | GCF_000008805.1  | 2,272,360   | 1         | 12,532         | 32,194      |
| <i>Pseudomonas aeruginosa</i>     | GCF_000006765.1  | 6,264,404   | 1         | 9,951          | 6,329       |
| <i>Salmonella enterica</i>        | GCF_000006945.2  | 4,951,383   | 2         | 11,657         | 11,668      |
| <i>Staphylococcus aureus</i>      | GCF_000013425.1  | 2,821,361   | 1         | 9,381          | 5,404       |
| <i>Streptococcus pneumoniae</i>   | GCF_000007045.1  | 2,038,615   | 1         | 8,843          | 6,080       |

# Read simulation

| Sample                            | Badread parameters |             |          |                       |       |      |        |          |            | ART parameters |     |      |       |      |
|-----------------------------------|--------------------|-------------|----------|-----------------------|-------|------|--------|----------|------------|----------------|-----|------|-------|------|
|                                   | quantity           | length      | identity | start_adap end_adapte |       | junk | random | chimeras | glitches   | seqSys         | len | fcov | mflen | sdev |
|                                   |                    |             |          | ter_seq               | r_seq |      |        |          |            |                |     |      |       |      |
| <i>Campylobacter jejuni</i>       | 200x               | 20788,06361 | 94,097,2 | 26                    | 15    | 0    | 0      | 1        | 7083,40,25 | MSv1           | 250 | 90   | 340   | 53   |
| <i>Escherichia coli</i>           | 280x               | 26103,08384 | 93,095,5 | 2                     | 40    | 0    | 0      | 1        | 5766,28,08 | HS25           | 150 | 110  | 420   | 21   |
| <i>Klebsiella pneumoniae</i>      | 210x               | 14688,12402 | 91,095,5 | 2                     | 44    | 0    | 0      | 2        | 3422,44,04 | HSxt           | 150 | 40   | 500   | 122  |
| <i>Listeria monocytogenes</i>     | 150x               | 30814,24000 | 96,100,3 | 9                     | 16    | 0    | 0      | 1        | 8367,28,14 | MSv3           | 250 | 130  | 300   | 30   |
| <i>Mycobacterium tuberculosis</i> | 270x               | 25285,19637 | 93,096,4 | 2                     | 19    | 0    | 0      | 3        | 7377,10,28 | HS25           | 125 | 70   | 460   | 31   |
| <i>Neisseria meningitidis</i>     | 250x               | 37314,27176 | 96,098,5 | 27                    | 14    | 0    | 0      | 1        | 6710,44,32 | HS20           | 100 | 120  | 540   | 45   |
| <i>Pseudomonas aeruginosa</i>     | 260x               | 35001,18994 | 93,100,5 | 21                    | 2     | 0    | 0      | 2        | 6726,25,27 | HS25           | 125 | 80   | 660   | 51   |
| <i>Salmonella enterica</i>        | 120x               | 35097,26894 | 91,097,2 | 43                    | 12    | 0    | 0      | 2        | 8267,31,28 | HS20           | 100 | 50   | 580   | 61   |
| <i>Staphylococcus aureus</i>      | 190x               | 36588,29376 | 93,095,4 | 23                    | 14    | 0    | 0      | 0        | 4138,03,07 | HS25           | 150 | 60   | 380   | 81   |
| <i>Streptococcus pneumoniae</i>   | 230x               | 13506,05927 | 93,096,3 | 43                    | 2     | 0    | 0      | 2        | 7045,14,11 | HSXn           | 150 | 100  | 620   | 117  |

# Reads

| Sample                            | Nanopore reads |               |            |                |               |            | Illumina reads |             |             |             |             |     |
|-----------------------------------|----------------|---------------|------------|----------------|---------------|------------|----------------|-------------|-------------|-------------|-------------|-----|
|                                   | All            |               |            | After Filtlong |               |            | All            |             | After fastp |             | Insert size |     |
|                                   | Read count     | Total size    | N50 length | Read count     | Total size    | N50 length | Read count     | Total size  | Read count  | Total size  | Min         | Max |
| <i>Campylobacter jejuni</i>       | 15,899         | 328,306,798   | 21,857     | 14,928         | 311,892,601   | 22,060     | 590,932        | 147,733,000 | 590,932     | 147,733,000 | 255         | 465 |
| <i>Escherichia coli</i>           | 49,890         | 1,299,671,812 | 27,746     | 47,015         | 1,234,698,132 | 27,919     | 3,403,874      | 510,581,100 | 3,403,874   | 510,530,164 | 371         | 469 |
| <i>Klebsiella pneumoniae</i>      | 82,543         | 1,193,314,755 | 21,903     | 63,165         | 1,133,657,145 | 22,808     | 1,576,992      | 236,548,800 | 1,576,992   | 236,536,750 | 224         | 784 |
| <i>Listeria monocytogenes</i>     | 14,298         | 441,712,781   | 44,029     | 12,144         | 419,627,702   | 45,127     | 1,531,154      | 382,788,500 | 1,531,154   | 382,788,500 | 253         | 370 |
| <i>Mycobacterium tuberculosis</i> | 46,881         | 1,191,127,196 | 35,763     | 39,001         | 1,131,573,946 | 36,767     | 2,470,454      | 308,806,750 | 2,470,454   | 308,783,950 | 387         | 534 |
| <i>Neisseria meningitidis</i>     | 15,314         | 568,095,071   | 49,909     | 13,266         | 539,720,684   | 50,644     | 2,726,832      | 272,683,200 | 2,726,832   | 272,495,564 | 433         | 653 |
| <i>Pseudomonas aeruginosa</i>     | 46,435         | 1,628,785,042 | 42,003     | 42,376         | 1,547,378,832 | 42,658     | 4,009,216      | 501,152,000 | 4,009,216   | 501,141,756 | 541         | 779 |
| <i>Salmonella enterica</i>        | 16,818         | 594,179,503   | 49,693     | 14,866         | 564,494,157   | 50,514     | 2,494,476      | 249,447,600 | 2,494,476   | 249,440,222 | 437         | 723 |
| <i>Staphylococcus aureus</i>      | 14,770         | 536,073,199   | 52,657     | 12,392         | 509,272,441   | 53,772     | 1,128,424      | 169,263,600 | 1,128,424   | 169,220,628 | 197         | 570 |
| <i>Streptococcus pneumoniae</i>   | 34,436         | 468,903,406   | 15,366     | 31,175         | 445,462,552   | 15,661     | 1,359,070      | 203,860,500 | 1,359,070   | 203,832,422 | 346         | 893 |

# Assemblies

| Sample                            | Unicycler hybrid |         |                     |              |            | Miniasm       |         |                     |              |            | Raven         |         |                     |              |            | Flye          |         |                     |              |            | Tricycler     |         |                     |              |            |
|-----------------------------------|------------------|---------|---------------------|--------------|------------|---------------|---------|---------------------|--------------|------------|---------------|---------|---------------------|--------------|------------|---------------|---------|---------------------|--------------|------------|---------------|---------|---------------------|--------------|------------|
|                                   | Assembly size    | Contigs | Complete chromosome | Time (h:m:s) | RAM (kB)   | Assembly size | Contigs | Complete chromosome | Time (h:m:s) | RAM (kB)   | Assembly size | Contigs | Complete chromosome | Time (h:m:s) | RAM (kB)   | Assembly size | Contigs | Complete chromosome | Time (h:m:s) | RAM (kB)   | Assembly size | Contigs | Complete chromosome | Time (h:m:s) | RAM (kB)   |
| <i>Campylobacter jejuni</i>       | 1,641,472        | 1       | yes                 | 0:57:03      | 12,170,432 | 1,641,573     | 1       | yes                 | 0:04:25      | 6,210,684  | 1,641,386     | 1       | yes                 | 0:01:20      | 2,865,080  | 1,641,424     | 1       | yes                 | 0:27:42      | 9,601,036  | 1,641,477     | 1       | yes                 | 0:39:43      | 8,385,200  |
| <i>Escherichia coli</i>           | 4,641,651        | 1       | yes                 | 2:33:19      | 21,301,536 | 4,642,148     | 1       | yes                 | 0:19:55      | 11,025,428 | 4,641,776     | 1       | yes                 | 0:06:01      | 11,361,088 | 4,641,573     | 1       | yes                 | 0:47:38      | 14,448,860 | 4,641,647     | 1       | yes                 | 1:14:21      | 11,458,888 |
| <i>Klebsiella pneumoniae</i>      | 5,682,317        | 7       | yes                 | 2:15:26      | 22,701,332 | 5,675,071     | 4       | yes                 | 0:17:14      | 11,872,580 | 5,673,918     | 4       | yes                 | 0:05:55      | 11,073,836 | 5,682,179     | 5       | yes                 | 0:28:50      | 11,639,508 | 5,673,839     | 4       | yes                 | 1:31:58      | 10,309,436 |
| <i>Listeria monocytogenes</i>     | 2,944,529        | 1       | yes                 | 1:47:10      | 7,639,920  | 2,944,620     | 1       | yes                 | 0:05:46      | 13,679,532 | 2,942,987     | 1       | yes                 | 0:01:43      | 4,015,320  | 2,944,529     | 1       | yes                 | 0:33:17      | 21,489,260 | 2,944,528     | 1       | yes                 | 0:59:10      | 20,276,076 |
| <i>Mycobacterium tuberculosis</i> | 4,411,523        | 1       | yes                 | 4:01:05      | 44,198,720 | 4,411,853     | 1       | yes                 | 0:18:00      | 15,271,984 | 4,411,552     | 1       | yes                 | 0:05:42      | 10,977,824 | 4,411,490     | 1       | yes                 | 0:47:51      | 22,155,296 | 4,411,532     | 1       | yes                 | 1:12:17      | 17,770,864 |
| <i>Neisseria meningitidis</i>     | 2,240,343        | 2       | almost              | 4:13:26      | 24,426,200 | 2,272,506     | 1       | yes                 | 0:09:57      | 25,029,344 | 2,272,363     | 1       | yes                 | 0:02:50      | 5,167,476  | 2,272,351     | 1       | yes                 | 1:41:49      | 38,550,464 | 2,272,360     | 1       | yes                 | 1:20:51      | 23,669,660 |
| <i>Pseudomonas aeruginosa</i>     | 6,264,411        | 1       | yes                 | 6:46:48      | 21,115,984 | 6,265,024     | 1       | yes                 | 0:25:42      | 19,329,416 | 6,264,482     | 1       | yes                 | 0:08:05      | 15,202,356 | 6,264,389     | 1       | yes                 | 1:07:01      | 25,104,308 | 6,264,404     | 1       | yes                 | 1:37:02      | 23,946,104 |
| <i>Salmonella enterica</i>        | 4,951,381        | 2       | yes                 | 2:20:02      | 21,986,216 | 4,951,515     | 2       | yes                 | 0:07:18      | 7,551,480  | 4,951,147     | 2       | yes                 | 0:03:00      | 5,477,756  | 4,949,345     | 2       | yes                 | 0:23:51      | 18,126,620 | 4,951,093     | 2       | yes                 | 1:18:29      | 20,650,204 |
| <i>Staphylococcus aureus</i>      | 2,821,354        | 1       | yes                 | 1:56:27      | 16,762,932 | 2,821,514     | 1       | yes                 | 0:07:04      | 12,853,784 | 2,821,323     | 1       | yes                 | 0:02:42      | 4,893,240  | 2,821,283     | 1       | yes                 | 0:27:30      | 21,566,232 | 2,821,361     | 1       | yes                 | 1:04:58      | 26,676,764 |
| <i>Streptococcus pneumoniae</i>   | 2,038,615        | 1       | yes                 | 2:12:50      | 11,581,680 | 2,038,746     | 1       | yes                 | 0:06:19      | 6,947,452  | 2,038,540     | 1       | yes                 | 0:01:48      | 4,248,164  | 2,038,534     | 1       | yes                 | 0:22:53      | 7,140,940  | 2,038,615     | 1       | yes                 | 0:38:18      | 5,634,940  |

# Flye circularisation

| <b>Assembly</b>                   | <b>Circ<br/>error<br/>size</b> | <b>Extra<br/>bases</b> | <b>Missing<br/>bases</b> |
|-----------------------------------|--------------------------------|------------------------|--------------------------|
| <i>Campylobacter jejuni</i>       | 3                              | ATG                    |                          |
| <i>Escherichia coli</i>           | 0                              |                        |                          |
| <i>Klebsiella pneumoniae</i>      | -7                             |                        | TTTGATG                  |
| <i>Listeria monocytogenes</i>     | 1                              | A                      |                          |
| <i>Mycobacterium tuberculosis</i> | 0                              |                        |                          |
| <i>Neisseria meningitidis</i>     | -9                             |                        | AGACGGCAT                |
| <i>Pseudomonas aeruginosa</i>     | -1                             |                        | C                        |
| <i>Salmonella enterica</i>        | -6                             |                        | GGAGTT                   |
| <i>Staphylococcus aureus</i>      | -9                             |                        | ATGAACATT                |
| <i>Streptococcus pneumoniae</i>   | 2                              | AA                     |                          |

Mean error size: 3.8

# Comparisons

| Sample                            | Unicycler     |                       | Miniasm       |                       | Miniasm+Pilon |                       | Raven         |                       | Raven+Pilon   |                       | Flye          |                       | Flye+Pilon    |                       | Flye (fixed circ) |                       | Flye (fixed circ)+Pilon |                       | Tricycler     |                       | Tricycler+Pilon |                       |
|-----------------------------------|---------------|-----------------------|---------------|-----------------------|---------------|-----------------------|---------------|-----------------------|---------------|-----------------------|---------------|-----------------------|---------------|-----------------------|-------------------|-----------------------|-------------------------|-----------------------|---------------|-----------------------|-----------------|-----------------------|
|                                   | Mean identity | Worst 100 bp identity | Mean identity | Worst 100 bp identity | Mean identity | Worst 100 bp identity | Mean identity | Worst 100 bp identity | Mean identity | Worst 100 bp identity | Mean identity | Worst 100 bp identity | Mean identity | Worst 100 bp identity | Mean identity     | Worst 100 bp identity | Mean identity           | Worst 100 bp identity | Mean identity | Worst 100 bp identity | Mean identity   | Worst 100 bp identity |
| <i>Campylobacter jejuni</i>       | 99.99098%     | 54%                   | 99.98093%     | 90%                   | 99.99994%     | 99%                   | 99.98672%     | 26%                   | 99.99525%     | 26%                   | 99.99616%     | 97%                   | 99.99982%     | 97%                   | 99.99634%         | 98%                   | 100.00000%              | 100%                  | 99.99976%     | 99%                   | 100.00000%      | 100%                  |
| <i>Escherichia coli</i>           | 99.99849%     | 92%                   | 99.98126%     | 91%                   | 99.99994%     | 98%                   | 99.98759%     | 88%                   | 99.99925%     | 88%                   | 99.99830%     | 98%                   | 99.99998%     | 99%                   | 99.99830%         | 98%                   | 99.99998%               | 99%                   | 99.99989%     | 99%                   | 100.00000%      | 100%                  |
| <i>Klebsiella pneumoniae</i>      | 99.99981%     | 98%                   | 99.96261%     | 88%                   | 99.99953%     | 89%                   | 99.97421%     | 21%                   | 99.99745%     | 21%                   | 99.98030%     | 93%                   | 99.99972%     | 93%                   | 99.98043%         | 97%                   | 99.99985%               | 99%                   | 99.99873%     | 99%                   | 100.00000%      | 100%                  |
| <i>Listeria monocytogenes</i>     | 99.99925%     | 96%                   | 99.99463%     | 91%                   | 100.00000%    | 100%                  | 99.94267%     | 0%                    | 99.94573%     | 0%                    | 99.99997%     | 99%                   | 99.99997%     | 99%                   | 100.00000%        | 100%                  | 100.00000%              | 100%                  | 100.00000%    | 100%                  | 100.00000%      | 100%                  |
| <i>Mycobacterium tuberculosis</i> | 99.99971%     | 91%                   | 99.98629%     | 95%                   | 99.99991%     | 97%                   | 99.99218%     | 84%                   | 99.99959%     | 84%                   | 99.99905%     | 99%                   | 100.00000%    | 100%                  | 99.99905%         | 99%                   | 100.00000%              | 100%                  | 100.00000%    | 100%                  | 100.00000%      | 100%                  |
| <i>Neisseria meningitidis</i>     | 97.17851%     | 0%                    | 99.98944%     | 83%                   | 99.99780%     | 83%                   | 99.99529%     | 89%                   | 99.99930%     | 89%                   | 99.99960%     | 91%                   | 99.99960%     | 91%                   | 100.00000%        | 100%                  | 100.00000%              | 100%                  | 100.00000%    | 100%                  | 100.00000%      | 100%                  |
| <i>Pseudomonas aeruginosa</i>     | 99.99978%     | 93%                   | 99.98461%     | 90%                   | 99.99994%     | 97%                   | 99.99468%     | 61%                   | 99.99938%     | 61%                   | 99.99976%     | 99%                   | 99.99998%     | 99%                   | 99.99978%         | 99%                   | 100.00000%              | 100%                  | 100.00000%    | 100%                  | 100.00000%      | 100%                  |
| <i>Salmonella enterica</i>        | 99.99714%     | 57%                   | 99.97952%     | 93%                   | 99.99979%     | 96%                   | 99.98744%     | 26%                   | 99.99802%     | 26%                   | 99.95862%     | 93%                   | 99.99936%     | 94%                   | 99.95874%         | 94%                   | 99.99949%               | 94%                   | 99.99413%     | 98%                   | 99.99996%       | 99%                   |
| <i>Staphylococcus aureus</i>      | 99.99787%     | 84%                   | 99.98834%     | 96%                   | 100.00000%    | 100%                  | 99.99249%     | 57%                   | 99.99848%     | 57%                   | 99.99720%     | 91%                   | 99.99965%     | 91%                   | 99.99752%         | 99%                   | 99.99996%               | 99%                   | 100.00000%    | 100%                  | 100.00000%      | 100%                  |
| <i>Streptococcus pneumoniae</i>   | 100.00000%    | 100%                  | 99.98519%     | 92%                   | 99.99990%     | 98%                   | 99.99166%     | 56%                   | 99.99784%     | 56%                   | 99.99583%     | 98%                   | 99.99990%     | 98%                   | 99.99593%         | 99%                   | 100.00000%              | 100%                  | 100.00000%    | 100%                  | 100.00000%      | 100%                  |

# Repeat identities

| Sample                            | Unicycler<br>A vs B    |                      |                    |                  | Flye<br>A vs B         |                      |                    |                  | Flye<br>+Pilon<br>A vs B |                      |                    |                  | Flye (fixed circ)<br>A vs B |                      |                    |                  | Flye (fixed circ)<br>+Pilon<br>A vs B |                      |                    |                  | Tricycler<br>A vs B    |                      |                    |                  | Tricycler<br>+Pilon<br>A vs B |                      |                    |                  |
|-----------------------------------|------------------------|----------------------|--------------------|------------------|------------------------|----------------------|--------------------|------------------|--------------------------|----------------------|--------------------|------------------|-----------------------------|----------------------|--------------------|------------------|---------------------------------------|----------------------|--------------------|------------------|------------------------|----------------------|--------------------|------------------|-------------------------------|----------------------|--------------------|------------------|
|                                   | Non-repeat<br>identity | Non-repeat<br>Qscore | Repeat<br>identity | Repeat<br>Qscore | Non-repeat<br>identity | Non-repeat<br>Qscore | Repeat<br>identity | Repeat<br>Qscore | Non-repeat<br>identity   | Non-repeat<br>Qscore | Repeat<br>identity | Repeat<br>Qscore | Non-repeat<br>identity      | Non-repeat<br>Qscore | Repeat<br>identity | Repeat<br>Qscore | Non-repeat<br>identity                | Non-repeat<br>Qscore | Repeat<br>identity | Repeat<br>Qscore | Non-repeat<br>identity | Non-repeat<br>Qscore | Repeat<br>identity | Repeat<br>Qscore | Non-repeat<br>identity        | Non-repeat<br>Qscore | Repeat<br>identity | Repeat<br>Qscore |
| <i>Campylobacter jejuni</i>       | 100.00000%             | inf                  | 99.60099%          | 24.0             | 99.99628%              | 44.3                 | 99.99008%          | 40.0             | 99.99981%                | 57.3                 | 100.00000%         | inf              | 99.99646%                   | 44.5                 | 99.99008%          | 40.0             | 100.00000%                            | inf                  | 100.00000%         | inf              | 99.99988%              | 59.1                 | 99.99339%          | 41.8             | 100.00000%                    | inf                  | 100.00000%         | inf              |
| <i>Escherichia coli</i>           | 100.00000%             | inf                  | 99.93490%          | 31.9             | 99.99830%              | 47.7                 | 99.99814%          | 47.3             | 100.00000%               | inf                  | 99.99907%          | 50.3             | 99.99830%                   | 47.7                 | 99.99814%          | 47.3             | 100.00000%                            | inf                  | 99.99907%          | 50.3             | 99.99989%              | 59.6                 | 100.00000%         | inf              | 100.00000%                    | inf                  | 100.00000%         | inf              |
| <i>Klebsiella pneumoniae</i>      | 99.99998%              | 67.2                 | 99.98972%          | 39.9             | 99.98035%              | 37.1                 | 99.97715%          | 36.4             | 99.99998%                | 67.2                 | 99.98400%          | 38.0             | 99.98035%                   | 37.1                 | 99.98515%          | 38.3             | 99.99998%                             | 67.2                 | 99.99200%          | 41.0             | 99.99870%              | 48.9                 | 100.00000%         | inf              | 100.00000%                    | inf                  | 100.00000%         | inf              |
| <i>Listeria monocytogenes</i>     | 100.00000%             | inf                  | 99.94078%          | 32.3             | 100.00000%             | inf                  | 99.99731%          | 45.7             | 100.00000%               | inf                  | 99.99731%          | 45.7             | 100.00000%                  | inf                  | 100.00000%         | inf              | 100.00000%                            | inf                  | 100.00000%         | inf              | 100.00000%             | inf                  | 100.00000%         | inf              | 100.00000%                    | inf                  | 100.00000%         | inf              |
| <i>Mycobacterium tuberculosis</i> | 99.99977%              | 56.4                 | 99.99440%          | 42.5             | 99.99904%              | 50.2                 | 100.00000%         | inf              | 100.00000%               | inf                  | 100.00000%         | inf              | 99.99904%                   | 50.2                 | 100.00000%         | inf              | 100.00000%                            | inf                  | 100.00000%         | inf              | 100.00000%             | inf                  | 100.00000%         | inf              | 100.00000%                    | inf                  | 100.00000%         | inf              |
| <i>Neisseria meningitidis</i>     | 99.46904%              | 22.7                 | 73.47983%          | 5.8              | 100.00000%             | inf                  | 99.99541%          | 43.4             | 100.00000%               | inf                  | 99.99541%          | 43.4             | 100.00000%                  | inf                  | 100.00000%         | inf              | 100.00000%                            | inf                  | 100.00000%         | inf              | 100.00000%             | inf                  | 100.00000%         | inf              | 100.00000%                    | inf                  | 100.00000%         | inf              |
| <i>Pseudomonas aeruginosa</i>     | 99.99989%              | 59.5                 | 99.99264%          | 41.3             | 99.99979%              | 56.8                 | 99.99790%          | 46.8             | 100.00000%               | inf                  | 99.99895%          | 49.8             | 99.99979%                   | 56.8                 | 99.99895%          | 49.8             | 100.00000%                            | inf                  | 100.00000%         | inf              | 100.00000%             | inf                  | 100.00000%         | inf              | 100.00000%                    | inf                  | 100.00000%         | inf              |
| <i>Salmonella enterica</i>        | 99.99947%              | 52.8                 | 99.88451%          | 29.4             | 99.95896%              | 33.9                 | 99.94211%          | 32.4             | 99.99987%                | 59.0                 | 99.97461%          | 36.0             | 99.95896%                   | 33.9                 | 99.94820%          | 32.9             | 99.99987%                             | 59.0                 | 99.98070%          | 37.1             | 99.99416%              | 42.3                 | 99.99289%          | 41.5             | 100.00000%                    | inf                  | 99.99797%          | 46.9             |
| <i>Staphylococcus aureus</i>      | 100.00000%             | inf                  | 99.86436%          | 28.7             | 99.99748%              | 46.0                 | 99.97965%          | 36.9             | 99.99993%                | 61.4                 | 99.98191%          | 37.4             | 99.99752%                   | 46.0                 | 99.99774%          | 46.5             | 99.99996%                             | 64.4                 | 100.00000%         | inf              | 100.00000%             | inf                  | 100.00000%         | inf              | 100.00000%                    | inf                  | 100.00000%         | inf              |
| <i>Streptococcus pneumoniae</i>   | 100.00000%             | inf                  | 100.00000%         | inf              | 99.99575%              | 43.7                 | 100.00000%         | inf              | 99.99990%                | 60.0                 | 100.00000%         | inf              | 99.99585%                   | 43.8                 | 100.00000%         | inf              | 100.00000%                            | inf                  | 100.00000%         | inf              | 100.00000%             | inf                  | 100.00000%         | inf              | 100.00000%                    | inf                  | 100.00000%         | inf              |
| Average (mean)                    | 99.94091%              | 32.3                 | 96.96468%          | 15.2             | 99.99224%              | 41.1                 | 99.98642%          | 38.7             | 99.99996%                | 63.5                 | 99.99236%          | 41.2             | 99.99227%                   | 41.1                 | 99.99092%          | 40.4             | 99.99998%                             | 67.0                 | 99.99686%          | 45.0             | 99.99918%              | 50.9                 | 99.99848%          | 48.2             | 100.00000%                    | inf                  | 99.99977%          | 56.5             |
