# Supplementary material for: Trycycler: consensus long-read assemblies for bacterial genomes
Source: PubMed Central journal article supplement (PMC8442456; doi:10.1186/s13059-021-02483-z), 2021-09-14
Supplement: 13059_2021_2483_MOESM3_ESM.pdf [file 13059_2021_2483_MOESM3_ESM.pdf]

The **Genomes** worksheet contains information about the genomes that were used to generate the reads.

The **Reads** worksheet contains descriptions of the input read sets for each of the seven real genomes. This includes ligation-prep and rapid-prep Nanopore reads, as well as Illumina reads. Illumina reads were evenly split into two groups: group A was paired with ligation-prep Nanopore reads and group B was paired with rapid-prep Nanopore reads.

The **Assemblies** worksheet contains basic descriptions of each of the assemblies for each genome and computational stats. Some genome-level stats are also provided here, such as the longest repeat in each genome.

The **Flye circularisation** worksheet shows the circularisation error in Flye assemblies (missing or duplicated bases at the start/end of contigs) which were manually fixed for the 'Flye (fixed circ)' assemblies.

The **Comparisons** worksheet contains chromosome identity values for each of the assemblies. These were based on aligning the chromosomal contig for each read set A assembly to the chromosomal contig in the read set B assembly. For Flye, values are given for both unaltered Flye assemblies ('Flye') and Flye assemblies where circularisation issues have been manually fixed ('Flye (fixed circ)'). Note that not all assemblies for *Serratia marcescens* 17-147-1671 produced a complete chromosomal contig, and so this genome is excluded from this and subsequent worksheets.

The **ALE scores** worksheet contains overall ALE scores for each of the assemblies of the six analysed genomes. Note that this worksheet uses the unaltered Flye assemblies.

The **ALE scores (fixed circ)** contains the same data as the previous worksheet, except that it uses the Flye assemblies with manually-fixed circularisation.

The **ALE z-scores** worksheet contains the same data as the ALE scores worksheet, except that each score has been converted into a z-score (mean of 0 and stdev of 1) on a per-genome basis.

The **ALE z-scores (fixed circ)** worksheet contains the same data as the ALE scores (fixed circ) worksheet, except that each score has been converted into a z-score (mean of 0 and stdev of 1) on a per-genome basis.

The **Ideel results** worksheet contains the fraction of protein sequences in each assembly with an Ideel ratio of 95% or more. Note that this worksheet uses the unaltered Flye assemblies.

The **Ideel results (fixed circ)** contains the same data as the previous worksheet, except that it uses the Flye assemblies with manually-fixed circularisation.

The **Repeat identities** worksheet contains the sequence identities of all assemblies for both repeat and non-repeat regions of the genome. Identities are expressed both as percentages and a Q-scores.

The **Medaka order** worksheet contains results (same format as the Comparisons worksheet) for a few different orders of running Trycycler and Medaka.

# Genomes

| Sample                                 | Genome size | Replicons | Longest repeat |             |
|----------------------------------------|-------------|-----------|----------------|-------------|
|                                        |             |           | From Unicycler | From MUMmer |
| <i>Acinetobacter baumannii</i> J9      | 3,949,783   | 3         | 10,246         | 5,842       |
| <i>Citrobacter koseri</i> MINF_9D      | 4,833,163   | 3         | 29,556         | 28,824      |
| <i>Enterobacter kobei</i> MSB1_1B      | 5,093,569   | 6         | 14,947         | 12,473      |
| <i>Haemophilus</i> M1C132_1            | 2,124,989   | 6         | 7,322          | 7,896       |
| <i>Klebsiella oxytoca</i> MSB1_2C      | 5,995,634   | 5         | 10,787         | 5,622       |
| <i>Klebsiella variicola</i> INF345     | 5,952,932   | 6         | 5,656          | 5,582       |
| <i>Serratia marcescens</i> 17-147-1671 | 5,883,278   | 5         | 39,060         | 39,051      |

# Reads

| Sample                                 | Read set A              |               |            |               |               |            |                          |             |             |             |     | Read set B           |            |               |            |            |               |                          |            |             |            |             |     |     |             |  |
|----------------------------------------|-------------------------|---------------|------------|---------------|---------------|------------|--------------------------|-------------|-------------|-------------|-----|----------------------|------------|---------------|------------|------------|---------------|--------------------------|------------|-------------|------------|-------------|-----|-----|-------------|--|
|                                        | Nanopore ligation reads |               |            |               |               |            | Illumina reads - group A |             |             |             |     | Nanopore rapid reads |            |               |            |            |               | Illumina reads - group B |            |             |            |             |     |     |             |  |
|                                        | All                     |               |            | After Filtrng |               |            | All                      |             | After fastp |             |     | Insert size          |            | All           |            |            | After Filtrng |                          |            | All         |            | After fastp |     |     | Insert size |  |
|                                        | Read count              | Total size    | N50 length | Read count    | Total size    | N50 length | Read count               | Total size  | Read count  | Total size  | Min | Max                  | Read count | Total size    | N50 length | Read count | Total size    | N50 length               | Read count | Total size  | Read count | Total size  | Min | Max |             |  |
| <i>Acinetobacter baumannii</i> J9      | 85,484                  | 1,070,356,827 | 21,638     | 60,765        | 1,016,840,396 | 22,623     | 3,115,226                | 454,925,397 | 3,073,586   | 448,907,913 | 157 | 712                  | 101,526    | 780,286,224   | 14,351     | 69,135     | 741,274,205   | 15,130                   | 3,115,226  | 454,886,971 | 3,073,051  | 448,801,170 | 157 | 713 |             |  |
| <i>Citrobacter koseri</i> MINF_9D      | 139,899                 | 1,009,600,962 | 18,781     | 79,387        | 959,121,239   | 19,909     | 2,284,300                | 332,880,816 | 2,247,899   | 327,687,679 | 159 | 721                  | 213,402    | 1,666,038,163 | 14,142     | 143,774    | 1,582,736,706 | 14,924                   | 2,284,300  | 332,916,017 | 2,247,656  | 327,668,697 | 159 | 721 |             |  |
| <i>Enterobacter kobei</i> MSB1_1B      | 45,191                  | 625,579,715   | 21,856     | 34,327        | 594,322,331   | 22,638     | 2,046,868                | 298,913,783 | 2,016,063   | 294,505,747 | 160 | 719                  | 128,031    | 987,293,009   | 15,407     | 80,886     | 937,930,249   | 16,234                   | 2,046,866  | 298,849,729 | 2,016,193  | 294,466,039 | 160 | 717 |             |  |
| <i>Haemophilus</i> M1C132_1            | 220,304                 | 1,342,021,782 | 16,260     | 127,998       | 1,274,921,933 | 17,502     | 1,983,498                | 290,238,947 | 1,953,677   | 285,707,813 | 160 | 758                  | 271,823    | 1,704,343,789 | 10,276     | 185,001    | 1,619,105,604 | 10,569                   | 1,983,498  | 290,147,888 | 1,953,695  | 285,623,168 | 160 | 757 |             |  |
| <i>Klebsiella oxytoca</i> MSB1_2C      | 36,750                  | 483,128,849   | 24,765     | 25,498        | 458,972,442   | 25,971     | 3,637,684                | 530,737,946 | 3,586,483   | 523,267,046 | 157 | 716                  | 105,226    | 808,961,843   | 14,406     | 69,978     | 768,514,620   | 15,181                   | 3,637,682  | 530,767,101 | 3,587,102  | 523,390,295 | 157 | 716 |             |  |
| <i>Klebsiella variicola</i> INF345     | 167,862                 | 1,452,069,004 | 25,814     | 80,509        | 1,379,466,058 | 27,115     | 1,666,578                | 242,275,969 | 1,640,587   | 238,549,905 | 156 | 704                  | 132,640    | 998,133,789   | 14,587     | 85,440     | 948,228,758   | 15,364                   | 1,666,578  | 242,310,384 | 1,640,733  | 238,588,432 | 156 | 705 |             |  |
| <i>Serratia marcescens</i> 17-147-1671 | 139,058                 | 1,091,695,992 | 20,731     | 81,121        | 1,037,111,473 | 22,098     | 1,585,894                | 232,121,118 | 1,556,040   | 227,792,294 | 158 | 734                  | 138,974    | 699,122,054   | 9,898      | 94,341     | 664,166,169   | 10,457                   | 1,585,894  | 232,065,297 | 1,556,079  | 227,754,139 | 158 | 755 |             |  |



# Flye circularisation

| <b>Assembly</b>                      | <b>Circ<br/>error<br/>size</b> | <b>Extra<br/>bases</b> | <b>Missing bases</b> |
|--------------------------------------|--------------------------------|------------------------|----------------------|
| <i>Acinetobacter baumannii</i> J9 A  | -1                             |                        | T                    |
| <i>Acinetobacter baumannii</i> J9 B  | -2                             |                        | AA                   |
| <i>Citrobacter koseri</i> MINF_9D A  | 0                              |                        |                      |
| <i>Citrobacter koseri</i> MINF_9D B  | -4                             |                        | TAAT                 |
| <i>Enterobacter kobei</i> MSB1_1B A  | 1                              | T                      |                      |
| <i>Enterobacter kobei</i> MSB1_1B B  | -4                             |                        | AGTT                 |
| <i>Haemophilus</i> M1C132_1 A        | 0                              |                        |                      |
| <i>Haemophilus</i> M1C132_1 B        | 4                              | TTTA                   |                      |
| <i>Klebsiella oxytoca</i> MSB1_2C A  | -9                             |                        | ATAGGGAGT            |
| <i>Klebsiella oxytoca</i> MSB1_2C B  | -1                             |                        | C                    |
| <i>Klebsiella variicola</i> INF345 A | -4                             |                        | AAAT                 |
| <i>Klebsiella variicola</i> INF345 B | -13                            |                        | CCAGGCATCAAAT        |

Mean error size: 3.5833

# Comparisons

| Sample                            | Unicycler<br>A vs B               |                             | Miniasm<br>A vs B |                             | Miniasm<br>+Medaka<br>A vs B |                             | Miniasm<br>+Medaka+Pilon<br>A vs B |                             | Raven<br>A vs B |                             | Raven<br>+Medaka<br>A vs B |                             | Raven<br>+Medaka+Pilon<br>A vs B |                             | Flye<br>A vs B |                             | Flye<br>+Medaka<br>A vs B |                             | Flye<br>+Medaka+Pilon<br>A vs B |                             | Flye (fixed circ)<br>A vs B |                             | Flye (fixed circ)<br>+Medaka<br>A vs B |                             | Flye (fixed circ)<br>+Medaka+Pilon<br>A vs B |                             | Trycycler<br>A vs B |                             | Trycycler<br>+Medaka<br>A vs B |                             | Trycycler<br>+Medaka+Pilon<br>A vs B |                             |
|-----------------------------------|-----------------------------------|-----------------------------|-------------------|-----------------------------|------------------------------|-----------------------------|------------------------------------|-----------------------------|-----------------|-----------------------------|----------------------------|-----------------------------|----------------------------------|-----------------------------|----------------|-----------------------------|---------------------------|-----------------------------|---------------------------------|-----------------------------|-----------------------------|-----------------------------|----------------------------------------|-----------------------------|----------------------------------------------|-----------------------------|---------------------|-----------------------------|--------------------------------|-----------------------------|--------------------------------------|-----------------------------|
|                                   | Mean                              | Worst<br>100 bp<br>identity | Mean              | Worst<br>100 bp<br>identity | Mean                         | Worst<br>100 bp<br>identity | Mean                               | Worst<br>100 bp<br>identity | Mean            | Worst<br>100 bp<br>identity | Mean                       | Worst<br>100 bp<br>identity | Mean                             | Worst<br>100 bp<br>identity | Mean           | Worst<br>100 bp<br>identity | Mean                      | Worst<br>100 bp<br>identity | Mean                            | Worst<br>100 bp<br>identity | Mean                        | Worst<br>100 bp<br>identity | Mean                                   | Worst<br>100 bp<br>identity | Mean                                         | Worst<br>100 bp<br>identity | Mean                | Worst<br>100 bp<br>identity | Mean                           | Worst<br>100 bp<br>identity | Mean                                 | Worst<br>100 bp<br>identity |
|                                   | <i>Acinetobacter baumannii</i> J9 | 99.99871%                   | 64%               | 99.65311%                   | 16%                          | 99.73517%                   | 33%                                | 99.76137%                   | 35%             | 99.89528%                   | 0%                         | 99.92994%                   | 0%                               | 99.93392%                   | 0%             | 99.97512%                   | 90%                       | 99.99689%                   | 98%                             | 99.9992%                    | 98%                         | 99.97520%                   | 90%                                    | 99.99697%                   | 98%                                          | 100.00000%                  | 100%                | 99.98478%                   | 97%                            | 99.99795%                   | 98%                                  | 100.00000%                  |
| <i>Citrobacter koseri</i> MINF_9D | 99.99823%                         | 28%                         |                   |                             |                              |                             |                                    |                             |                 |                             |                            |                             |                                  |                             | 99.96541%      | 81%                         | 99.99334%                 | 96%                         | 99.99981%                       | 96%                         | 99.96549%                   | 81%                         | 99.99342%                              | 96%                         | 99.99989%                                    | 99%                         | 99.98607%           | 98%                         | 99.99592%                      | 97%                         | 99.99998%                            | 99%                         |
| <i>Enterobacter kobei</i> MSB1_1B | 99.99731%                         | 12%                         | 99.93576%         | 49%                         | 99.97602%                    | 93%                         | 99.99994%                          | 99%                         | 99.95272%       | 19%                         | 99.97801%                  | 19%                         | 99.99752%                        | 19%                         | 99.94805%      | 87%                         | 99.97336%                 | 96%                         | 99.99971%                       | 96%                         | 99.94815%                   | 87%                         | 99.97346%                              | 96%                         | 99.99981%                                    | 98%                         | 99.97128%           | 96%                         | 99.98357%                      | 97%                         | 99.99994%                            | 98%                         |
| <i>Haemophilus</i> M1C132_1       | 99.92629%                         | 0%                          |                   |                             |                              |                             |                                    |                             | 99.94055%       | 63%                         | 99.99030%                  | 78%                         | 99.99742%                        | 78%                         | 99.96929%      | 84%                         | 99.99186%                 | 96%                         | 99.99971%                       | 96%                         | 99.96949%                   | 84%                         | 99.99206%                              | 98%                         | 99.99990%                                    | 99%                         | 99.98455%           | 96%                         | 99.99401%                      | 96%                         | 99.99976%                            | 96%                         |
| <i>Klebsiella oxytoca</i> MSB1_2C | 99.85277%                         | 11%                         | 99.89432%         | 22%                         | 99.92740%                    | 26%                         | 99.93321%                          | 26%                         | 99.96049%       | 19%                         | 99.99288%                  | 44%                         | 99.99895%                        | 44%                         | 99.96640%      | 76%                         | 99.99419%                 | 91%                         | 99.99969%                       | 91%                         | 99.96657%                   | 76%                         | 99.99437%                              | 96%                         | 99.99986%                                    | 96%                         | 99.98251%           | 97%                         | 99.99504%                      | 97%                         | 99.99998%                            | 99%                         |
| <i>Klebsiella varicola</i> INF345 | 99.99500%                         | 26%                         | 99.93308%         | 0%                          | 99.97467%                    | 0%                          | 99.98165%                          | 0%                          | 99.92892%       | 0%                          | 99.96548%                  | 0%                          | 99.97273%                        | 0%                          | 99.95488%      | 73%                         | 99.98680%                 | 91%                         | 99.99978%                       | 91%                         | 99.95504%                   | 73%                         | 99.98697%                              | 96%                         | 99.99994%                                    | 98%                         | 99.97923%           | 96%                         | 99.99415%                      | 97%                         | 99.99996%                            | 98%                         |

# ALE scores

|                                                 | Unicycler    | Flye         | Flye<br>+Medaka | Flye<br>+Medaka+Pilon | Tracycler    | Tracycler<br>+Medaka | Tracycler<br>+Medaka+Pilon |
|-------------------------------------------------|--------------|--------------|-----------------|-----------------------|--------------|----------------------|----------------------------|
| <i>Acinetobacter baumannii</i> J9 - read set A  | -68,751,495  | -69,851,511  | -68,764,072     | -68,670,883           | -69,597,973  | -68,734,531          | -68,669,456                |
| <i>Acinetobacter baumannii</i> J9 - read set B  | -68,820,892  | -70,694,877  | -68,841,011     | -68,673,433           | -70,307,643  | -68,801,834          | -68,669,456                |
| <i>Citrobacter koseri</i> MINF_9D - read set A  | -41,431,606  | -43,043,830  | -41,604,961     | -41,322,390           | -42,440,272  | -41,486,711          | -41,294,467                |
| <i>Citrobacter koseri</i> MINF_9D - read set B  | -41,396,907  | -43,306,383  | -41,615,646     | -41,320,183           | -42,610,011  | -41,508,539          | -41,302,769                |
| <i>Enterobacter kobei</i> MSB1_1B - read set A  | -68,382,308  | -70,992,926  | -69,702,370     | -68,368,413           | -70,140,607  | -69,278,458          | -68,332,909                |
| <i>Enterobacter kobei</i> MSB1_1B - read set B  | -68,386,694  | -71,141,965  | -69,570,812     | -68,348,288           | -70,377,882  | -69,242,761          | -68,338,219                |
| <i>Haemophilus</i> M1C132_1 - read set A        | -111,530,139 | -112,327,531 | -111,693,172    | -111,483,596          | -111,951,158 | -111,651,146         | -111,482,933               |
| <i>Haemophilus</i> M1C132_1 - read set B        | -111,606,825 | -112,827,118 | -111,857,505    | -111,492,937          | -112,332,292 | -111,750,901         | -111,465,398               |
| <i>Klebsiella oxytoca</i> MSB1_2C - read set A  | -134,631,858 | -137,115,849 | -134,747,666    | -134,454,433          | -136,220,774 | -134,690,431         | -134,411,349               |
| <i>Klebsiella oxytoca</i> MSB1_2C - read set B  | -135,327,640 | -137,599,430 | -134,766,778    | -134,420,052          | -136,585,895 | -134,720,644         | -134,402,870               |
| <i>Klebsiella variicola</i> INF345 - read set A | -82,942,439  | -84,400,589  | -83,230,715     | -82,894,952           | -83,973,858  | -83,012,753          | -82,892,149                |
| <i>Klebsiella variicola</i> INF345 - read set B | -82,955,365  | -84,664,983  | -83,151,089     | -82,898,292           | -84,123,419  | -83,038,509          | -82,891,219                |

# ALE scores (fixed circ)

|                                                 | Unicycler    | Flye (fixed circ) | Flye (fixed circ)<br>+Medaka | Flye (fixed circ)<br>+Medaka+Pilon | Tricycler    | Tricycler<br>+Medaka | Tricycler<br>+Medaka+Pilon |
|-------------------------------------------------|--------------|-------------------|------------------------------|------------------------------------|--------------|----------------------|----------------------------|
| <i>Acinetobacter baumannii</i> J9 - read set A  | -68,751,495  | -69,850,089       | -68,762,644                  | -68,669,456                        | -69,597,973  | -68,734,531          | -68,669,456                |
| <i>Acinetobacter baumannii</i> J9 - read set B  | -68,820,892  | -70,690,752       | -68,837,033                  | -68,669,456                        | -70,307,643  | -68,801,834          | -68,669,456                |
| <i>Citrobacter koseri</i> MINF_9D - read set A  | -41,431,606  | -43,043,830       | -41,604,961                  | -41,322,390                        | -42,440,272  | -41,486,711          | -41,294,467                |
| <i>Citrobacter koseri</i> MINF_9D - read set B  | -41,396,907  | -43,303,016       | -41,611,806                  | -41,316,343                        | -42,610,011  | -41,508,539          | -41,302,769                |
| <i>Enterobacter kobei</i> MSB1_1B - read set A  | -68,382,308  | -70,992,304       | -69,700,547                  | -68,366,580                        | -70,140,607  | -69,278,458          | -68,332,909                |
| <i>Enterobacter kobei</i> MSB1_1B - read set B  | -68,386,694  | -71,138,223       | -69,567,063                  | -68,344,539                        | -70,377,882  | -69,242,761          | -68,338,219                |
| <i>Haemophilus</i> M1C132_1 - read set A        | -111,530,139 | -112,327,531      | -111,693,172                 | -111,483,596                       | -111,951,158 | -111,651,146         | -111,482,933               |
| <i>Haemophilus</i> M1C132_1 - read set B        | -111,606,825 | -112,818,648      | -111,848,996                 | -111,484,427                       | -112,332,292 | -111,750,901         | -111,465,398               |
| <i>Klebsiella oxytoca</i> MSB1_2C - read set A  | -134,631,858 | -137,101,813      | -134,733,325                 | -134,440,092                       | -136,220,774 | -134,690,431         | -134,411,349               |
| <i>Klebsiella oxytoca</i> MSB1_2C - read set B  | -135,327,640 | -137,598,249      | -134,765,629                 | -134,418,904                       | -136,585,895 | -134,720,644         | -134,402,870               |
| <i>Klebsiella variicola</i> INF345 - read set A | -82,942,439  | -84,398,012       | -83,228,161                  | -82,892,397                        | -83,973,858  | -83,012,753          | -82,892,149                |
| <i>Klebsiella variicola</i> INF345 - read set B | -82,955,365  | -84,657,763       | -83,144,016                  | -82,891,219                        | -84,123,419  | -83,038,509          | -82,891,219                |



# ALE z-scores

|                                                 | Unicycler | Flye   | Flye<br>+Medaka | Flye<br>+Medaka+Pilon | Tracycler | Tracycler<br>+Medaka | Tracycler<br>+Medaka+Pilon |
|-------------------------------------------------|-----------|--------|-----------------|-----------------------|-----------|----------------------|----------------------------|
| <i>Acinetobacter baumannii</i> J9 - read set A  | 0.575     | -1.086 | 0.556           | 0.696                 | -0.704    | 0.600                | 0.699                      |
| <i>Acinetobacter baumannii</i> J9 - read set B  | 0.470     | -2.360 | 0.440           | 0.693                 | -1.775    | 0.499                | 0.699                      |
| <i>Citrobacter koseri</i> MINF_9D - read set A  | 0.597     | -1.791 | 0.340           | 0.759                 | -0.897    | 0.515                | 0.800                      |
| <i>Citrobacter koseri</i> MINF_9D - read set B  | 0.648     | -2.180 | 0.324           | 0.762                 | -1.149    | 0.483                | 0.788                      |
| <i>Enterobacter kobei</i> MSB1_1B - read set A  | 0.958     | -1.684 | -0.378          | 0.972                 | -0.822    | 0.051                | 1.008                      |
| <i>Enterobacter kobei</i> MSB1_1B - read set B  | 0.954     | -1.835 | -0.245          | 0.993                 | -1.062    | 0.087                | 1.003                      |
| <i>Haemophilus</i> M1C132_1 - read set A        | 0.728     | -1.288 | 0.316           | 0.845                 | -0.336    | 0.422                | 0.847                      |
| <i>Haemophilus</i> M1C132_1 - read set B        | 0.534     | -2.551 | -0.100          | 0.822                 | -1.300    | 0.170                | 0.891                      |
| <i>Klebsiella oxytoca</i> MSB1_2C - read set A  | 0.620     | -1.710 | 0.511           | 0.786                 | -0.871    | 0.565                | 0.827                      |
| <i>Klebsiella oxytoca</i> MSB1_2C - read set B  | -0.033    | -2.164 | 0.493           | 0.818                 | -1.213    | 0.536                | 0.834                      |
| <i>Klebsiella variicola</i> INF345 - read set A | 0.686     | -1.698 | 0.215           | 0.764                 | -1.000    | 0.571                | 0.769                      |
| <i>Klebsiella variicola</i> INF345 - read set B | 0.665     | -2.130 | 0.345           | 0.759                 | -1.245    | 0.529                | 0.770                      |

# ALE z-scores (fixed circ)

|                                                 | Unicycler | Flye (fixed circ) | Flye (fixed circ)<br>+Medaka | Flye (fixed circ)<br>+Medaka+Pilon | Tracycler | Tracycler<br>+Medaka | Tracycler<br>+Medaka+Pilon |
|-------------------------------------------------|-----------|-------------------|------------------------------|------------------------------------|-----------|----------------------|----------------------------|
| <i>Acinetobacter baumannii</i> J9 - read set A  | 0.573     | -1.087            | 0.556                        | 0.697                              | -0.706    | 0.599                | 0.697                      |
| <i>Acinetobacter baumannii</i> J9 - read set B  | 0.468     | -2.357            | 0.444                        | 0.697                              | -1.778    | 0.497                | 0.697                      |
| <i>Citrobacter koseri</i> MINF_9D - read set A  | 0.596     | -1.793            | 0.339                        | 0.758                              | -0.899    | 0.514                | 0.799                      |
| <i>Citrobacter koseri</i> MINF_9D - read set B  | 0.647     | -2.177            | 0.329                        | 0.767                              | -1.150    | 0.482                | 0.787                      |
| <i>Enterobacter kobei</i> MSB1_1B - read set A  | 0.957     | -1.685            | -0.377                       | 0.973                              | -0.823    | 0.050                | 1.007                      |
| <i>Enterobacter kobei</i> MSB1_1B - read set B  | 0.953     | -1.833            | -0.242                       | 0.996                              | -1.063    | 0.086                | 1.002                      |
| <i>Haemophilus</i> M1C132_1 - read set A        | 0.725     | -1.296            | 0.312                        | 0.843                              | -0.342    | 0.418                | 0.845                      |
| <i>Haemophilus</i> M1C132_1 - read set B        | 0.531     | -2.541            | -0.083                       | 0.841                              | -1.308    | 0.166                | 0.889                      |
| <i>Klebsiella oxytoca</i> MSB1_2C - read set A  | 0.617     | -1.701            | 0.522                        | 0.797                              | -0.874    | 0.562                | 0.824                      |
| <i>Klebsiella oxytoca</i> MSB1_2C - read set B  | -0.036    | -2.167            | 0.491                        | 0.817                              | -1.217    | 0.534                | 0.832                      |
| <i>Klebsiella variicola</i> INF345 - read set A | 0.684     | -1.699            | 0.216                        | 0.766                              | -1.005    | 0.569                | 0.766                      |
| <i>Klebsiella variicola</i> INF345 - read set B | 0.663     | -2.124            | 0.354                        | 0.768                              | -1.250    | 0.526                | 0.768                      |

# IDEEL results

|                                                 | Unicycler | Flye    | Flye<br>+Medaka | Flye<br>+Medaka<br>+Pilon | Tracycler | Tracycler<br>+Medaka | Tracycler<br>+Medaka<br>+Pilon |
|-------------------------------------------------|-----------|---------|-----------------|---------------------------|-----------|----------------------|--------------------------------|
| <i>Acinetobacter baumannii</i> J9 - read set A  | 0.98074   | 0.83440 | 0.96771         | 0.98074                   | 0.86345   | 0.97167              | 0.98075                        |
| <i>Acinetobacter baumannii</i> J9 - read set B  | 0.98074   | 0.74877 | 0.95873         | 0.98074                   | 0.78676   | 0.96461              | 0.98075                        |
| <i>Citrobacter koseri</i> MINF_9D - read set A  | 0.97408   | 0.74287 | 0.92229         | 0.97363                   | 0.79542   | 0.93346              | 0.97408                        |
| <i>Citrobacter koseri</i> MINF_9D - read set B  | 0.97385   | 0.70504 | 0.91679         | 0.97408                   | 0.77871   | 0.93698              | 0.97386                        |
| <i>Enterobacter kobei</i> MSB1_1B - read set A  | 0.97649   | 0.71420 | 0.88853         | 0.97582                   | 0.78683   | 0.93793              | 0.97626                        |
| <i>Enterobacter kobei</i> MSB1_1B - read set B  | 0.97649   | 0.67523 | 0.90247         | 0.97605                   | 0.75682   | 0.93183              | 0.97626                        |
| <i>Haemophilus</i> M1C132_1 - read set A        | 0.95781   | 0.73555 | 0.88579         | 0.95829                   | 0.83422   | 0.90540              | 0.95829                        |
| <i>Haemophilus</i> M1C132_1 - read set B        | 0.95734   | 0.66005 | 0.85060         | 0.95882                   | 0.74362   | 0.86836              | 0.95833                        |
| <i>Klebsiella oxytoca</i> MSB1_2C - read set A  | 0.98601   | 0.74720 | 0.95105         | 0.98564                   | 0.78714   | 0.95338              | 0.98564                        |
| <i>Klebsiella oxytoca</i> MSB1_2C - read set B  | 0.98526   | 0.69549 | 0.94823         | 0.98526                   | 0.75922   | 0.95041              | 0.98583                        |
| <i>Klebsiella variicola</i> INF345 - read set A | 0.98153   | 0.72098 | 0.90015         | 0.98193                   | 0.76292   | 0.95594              | 0.98193                        |
| <i>Klebsiella variicola</i> INF345 - read set B | 0.98193   | 0.69127 | 0.92822         | 0.98154                   | 0.73622   | 0.94877              | 0.98174                        |

# IDEEL results (fixed circ)

|                                                 | Unicycler | Flye<br>(fixed circ) | Flye<br>(fixed circ)<br>+Medaka | Flye<br>(fixed circ)<br>+Medaka<br>+Pilon | Tracycler | Tracycler<br>+Medaka | Tracycler<br>+Medaka<br>+Pilon |
|-------------------------------------------------|-----------|----------------------|---------------------------------|-------------------------------------------|-----------|----------------------|--------------------------------|
| <i>Acinetobacter baumannii</i> J9 - read set A  | 0.98074   | 0.83463              | 0.96771                         | 0.98075                                   | 0.86345   | 0.97167              | 0.98075                        |
| <i>Acinetobacter baumannii</i> J9 - read set B  | 0.98074   | 0.74877              | 0.95873                         | 0.98075                                   | 0.78676   | 0.96461              | 0.98075                        |
| <i>Citrobacter koseri</i> MINF_9D - read set A  | 0.97408   | 0.74287              | 0.92229                         | 0.97363                                   | 0.79542   | 0.93346              | 0.97408                        |
| <i>Citrobacter koseri</i> MINF_9D - read set B  | 0.97385   | 0.70439              | 0.91659                         | 0.97408                                   | 0.77871   | 0.93698              | 0.97386                        |
| <i>Enterobacter kobei</i> MSB1_1B - read set A  | 0.97649   | 0.71406              | 0.88926                         | 0.97582                                   | 0.78683   | 0.93793              | 0.97626                        |
| <i>Enterobacter kobei</i> MSB1_1B - read set B  | 0.97649   | 0.67503              | 0.90247                         | 0.97605                                   | 0.75682   | 0.93183              | 0.97626                        |
| <i>Haemophilus</i> M1C132_1 - read set A        | 0.95781   | 0.73555              | 0.88579                         | 0.95829                                   | 0.83422   | 0.90540              | 0.95829                        |
| <i>Haemophilus</i> M1C132_1 - read set B        | 0.95734   | 0.65990              | 0.85060                         | 0.95829                                   | 0.74362   | 0.86836              | 0.95833                        |
| <i>Klebsiella oxytoca</i> MSB1_2C - read set A  | 0.98601   | 0.74720              | 0.95105                         | 0.98564                                   | 0.78714   | 0.95338              | 0.98564                        |
| <i>Klebsiella oxytoca</i> MSB1_2C - read set B  | 0.98526   | 0.69509              | 0.94840                         | 0.98564                                   | 0.75922   | 0.95041              | 0.98583                        |
| <i>Klebsiella variicola</i> INF345 - read set A | 0.98153   | 0.72086              | 0.89996                         | 0.98193                                   | 0.76292   | 0.95594              | 0.98193                        |
| <i>Klebsiella variicola</i> INF345 - read set B | 0.98193   | 0.69144              | 0.92825                         | 0.98174                                   | 0.73622   | 0.94877              | 0.98174                        |

# Repeat identities

| Sample                             | Unicycler<br>A vs B    |                      |                    |                  | Flye<br>A vs B         |                      |                    |                  | Flye<br>+Medaka<br>A vs B |                      |                    |                  | Flye<br>+Medaka+Pilon<br>A vs B |                      |                    |                  | Flye (fixed circ)<br>A vs B |                      |                    |                  | Flye (fixed circ)<br>+Medaka<br>A vs B |                      |                    |                  | Flye (fixed circ)<br>+Medaka+Pilon<br>A vs B |                      |                    |                  | Tricycler<br>A vs B    |                      |                    |                  | Tricycler<br>+Medaka<br>A vs B |                      |                    |                  | Tricycler<br>+Medaka+Pilon<br>A vs B |      |            |      |
|------------------------------------|------------------------|----------------------|--------------------|------------------|------------------------|----------------------|--------------------|------------------|---------------------------|----------------------|--------------------|------------------|---------------------------------|----------------------|--------------------|------------------|-----------------------------|----------------------|--------------------|------------------|----------------------------------------|----------------------|--------------------|------------------|----------------------------------------------|----------------------|--------------------|------------------|------------------------|----------------------|--------------------|------------------|--------------------------------|----------------------|--------------------|------------------|--------------------------------------|------|------------|------|
|                                    | Non-repeat<br>identity | Non-repeat<br>Qscore | Repeat<br>identity | Repeat<br>Qscore | Non-repeat<br>identity | Non-repeat<br>Qscore | Repeat<br>identity | Repeat<br>Qscore | Non-repeat<br>identity    | Non-repeat<br>Qscore | Repeat<br>identity | Repeat<br>Qscore | Non-repeat<br>identity          | Non-repeat<br>Qscore | Repeat<br>identity | Repeat<br>Qscore | Non-repeat<br>identity      | Non-repeat<br>Qscore | Repeat<br>identity | Repeat<br>Qscore | Non-repeat<br>identity                 | Non-repeat<br>Qscore | Repeat<br>identity | Repeat<br>Qscore | Non-repeat<br>identity                       | Non-repeat<br>Qscore | Repeat<br>identity | Repeat<br>Qscore | Non-repeat<br>identity | Non-repeat<br>Qscore | Repeat<br>identity | Repeat<br>Qscore | Non-repeat<br>identity         | Non-repeat<br>Qscore | Repeat<br>identity | Repeat<br>Qscore |                                      |      |            |      |
| <i>Acinetobacter baumannii</i> J9  | 99.99903%              | 50.1                 | 99.98396%          | 37.9             | 99.97506%              | 36.0                 | 99.97779%          | 36.5             | 99.99699%                 | 45.2                 | 99.99260%          | 41.3             | 100.00000%                      | inf                  | 99.99630%          | 44.3             | 99.97506%                   | 36.0                 | 99.98149%          | 37.3             | 99.99699%                              | 45.2                 | 99.99630%          | 44.3             | 100.00000%                                   | inf                  | 100.00000%         | inf              | 99.98491%              | 38.2                 | 99.97903%          | 36.8             | 99.99793%                      | 46.8                 | 99.99877%          | 49.1             | 100.00000%                           | inf  | 100.00000% | inf  |
| <i>Citrobacter koseri</i> MNV1_30  | 99.99833%              | 48.0                 | 99.98941%          | 39.9             | 99.96494%              | 34.6                 | 99.98652%          | 38.7             | 99.99311%                 | 41.8                 | 99.99037%          | 40.2             | 100.00000%                      | inf                  | 99.99133%          | 40.6             | 99.96494%                   | 34.6                 | 99.99037%          | 40.2             | 99.99241%                              | 41.8                 | 99.99422%          | 42.4             | 100.00000%                                   | inf                  | 99.99519%          | 43.2             | 99.98597%              | 38.5                 | 99.99037%          | 40.2             | 99.99588%                      | 43.8                 | 99.99807%          | 47.2             | 100.00000%                           | inf  | 99.99904%  | 50.2 |
| <i>Enterobacter kobei</i> MSB1_1B  | 99.99746%              | 46.0                 | 99.99088%          | 40.4             | 99.94742%              | 32.8                 | 99.97537%          | 36.1             | 99.97302%                 | 35.7                 | 99.98814%          | 39.3             | 99.99989%                       | 59.8                 | 99.99179%          | 40.9             | 99.94750%                   | 32.8                 | 99.97628%          | 36.2             | 99.97310%                              | 35.7                 | 99.98906%          | 39.6             | 99.99998%                                    | 66.7                 | 99.99270%          | 41.4             | 99.97089%              | 35.4                 | 99.98814%          | 39.3             | 99.98336%                      | 37.8                 | 99.99270%          | 41.4             | 100.00000%                           | inf  | 99.99726%  | 45.6 |
| <i>Haemophilus M1C132_1</i>        | 99.98826%              | 35.0                 | 98.02041%          | 17.0             | 99.96911%              | 35.1                 | 99.97743%          | 36.5             | 99.99203%                 | 41.0                 | 99.98420%          | 38.0             | 100.00000%                      | inf                  | 99.98646%          | 38.7             | 99.96911%                   | 35.1                 | 99.98646%          | 38.7             | 99.99203%                              | 41.0                 | 99.99323%          | 41.7             | 100.00000%                                   | inf                  | 99.99549%          | 43.5             | 99.98426%              | 38.0                 | 99.99774%          | 46.5             | 99.99397%                      | 42.2                 | 99.99549%          | 43.5             | 99.99980%                            | 57.0 | 99.99774%  | 46.5 |
| <i>Klebsiella oxytoca</i> MSB1_2C  | 99.85205%              | 28.3                 | 99.90528%          | 30.2             | 99.96762%              | 34.9                 | 99.87616%          | 29.1             | 99.99452%                 | 42.6                 | 99.97034%          | 35.3             | 100.00000%                      | inf                  | 99.97679%          | 36.3             | 99.96762%                   | 34.9                 | 99.89906%          | 29.5             | 99.99452%                              | 42.6                 | 99.98323%          | 37.8             | 100.00000%                                   | inf                  | 99.98968%          | 39.9             | 99.98254%              | 37.6                 | 99.98053%          | 37.1             | 99.95502%                      | 43.0                 | 99.99613%          | 44.1             | 100.00000%                           | inf  | 99.99871%  | 48.9 |
| <i>Klebsiella variicola</i> INF345 | 99.99552%              | 43.5                 | 99.94877%          | 37.2             | 99.99476%              | 33.4                 | 99.99530%          | 34.6             | 99.98662%                 | 38.8                 | 99.98513%          | 38.3             | 99.99919%                       | 61.3                 | 99.98678%          | 38.8             | 99.95478%                   | 33.4                 | 99.97823%          | 36.7             | 99.98648%                              | 38.8                 | 99.99855%          | 47.8             | 99.99948%                                    | 62.5                 | 100.00000%         | inf              | 99.97909%              | 36.8                 | 99.99174%          | 40.8             | 99.99417%                      | 42.3                 | 99.99670%          | 44.8             | 99.99966%                            | 64.3 | 100.00000% | inf  |
| Average (mean)                     | 99.96305%              | 34.3                 | 99.97799%          | 23.7             | 99.96483%              | 34.5                 | 99.95865%          | 33.8             | 99.98999%                 | 40.0                 | 99.98513%          | 38.3             | 99.99998%                       | 66.7                 | 99.98853%          | 39.4             | 99.96485%                   | 34.5                 | 99.96473%          | 34.5             | 99.99001%                              | 40.0                 | 99.99121%          | 40.6             | 100.00000%                                   | 73.7                 | 99.99461%          | 42.7             | 99.98171%              | 37.4                 | 99.98718%          | 38.9             | 99.99323%                      | 41.7                 | 99.99623%          | 44.2             | 99.99966%                            | 64.0 | 99.99855%  | 48.4 |

# Medaka order

| Sample                             | Trycycler<br>+Medaka<br>A vs B |        |                             | Medaka<br>+Trycycler<br>A vs B |        |                             | Medaka<br>+Trycycler<br>+Medaka<br>A vs B |        |                             |
|------------------------------------|--------------------------------|--------|-----------------------------|--------------------------------|--------|-----------------------------|-------------------------------------------|--------|-----------------------------|
|                                    | Mean<br>identity               | Qscore | Worst<br>100 bp<br>identity | Mean<br>identity               | Qscore | Worst<br>100 bp<br>identity | Mean<br>identity                          | Qscore | Worst<br>100 bp<br>identity |
| <i>Acinetobacter baumannii</i> J9  | 99.99795%                      | 46.88  | 98%                         | 99.99710%                      | 45.38  | 98%                         | 99.99789%                                 | 46.76  | 98%                         |
| <i>Citrobacter koseri</i> MINF_9D  | 99.99592%                      | 43.89  | 97%                         | 99.99422%                      | 42.38  | 98%                         | 99.99523%                                 | 43.21  | 98%                         |
| <i>Enterobacter kobei</i> MSB1_1B  | 99.98357%                      | 37.84  | 97%                         | 99.98284%                      | 37.65  | 97%                         | 99.98334%                                 | 37.78  | 97%                         |
| <i>Haemophilus</i> M1C132_1        | 99.99401%                      | 42.23  | 96%                         | 99.99264%                      | 41.33  | 96%                         | 99.99381%                                 | 42.08  | 96%                         |
| <i>Klebsiella oxytoca</i> MSB1_2C  | 99.99504%                      | 43.05  | 97%                         | 99.99395%                      | 42.18  | 98%                         | 99.99450%                                 | 42.60  | 98%                         |
| <i>Klebsiella variicola</i> INF345 | 99.99415%                      | 42.33  | 97%                         | 99.99413%                      | 42.31  | 97%                         | 99.99406%                                 | 42.26  | 97%                         |
