# Supplementary material for: Trycycler: consensus long-read assemblies for bacterial genomes
Source: PubMed Central journal article supplement (PMC8442456; doi:10.1186/s13059-021-02483-z), 2021-09-14
Supplement: 13059_2021_2483_MOESM4_ESM.pdf [file 13059_2021_2483_MOESM4_ESM.pdf]

The **Matrix** worksheet contains a presence/absence matrix for each replicon in the consistency test genomes (the same information shown in Figure 3). Cell comments are used to describe cases of misassembly and extra contigs.

The **Trycycler vs Trycycler** worksheet shows the types of differences between all pairwise combinations of Trycycler-assembled chromosomes in the consistency test genomes.

The **Trycycler vs polished** worksheet shows the types of differences between Trycycler-assembled chromosomes and the short-read-polished chromosomes in the consistency test genomes.

The **Other vs other** worksheet shows the types of differences between all pairwise combinations of single-assembler-assembled chromosomes in the consistency test genomes.

The **Tester assemblers** worksheet shows which assemblers the Trycycler testers used to generate the input assemblies for Trycycler.

# Matrix

|                       | <b>Acinetobacter baumannii J9</b> |           |           |               | <b>Citrobacter koseri MINF_9D</b> |           |                    |               | <b>Enterobacter kobei MSB1_1B</b> |                  |           |                  |                  | <b>Haemophilus M1C132_1</b> |            |                  |           | <b>Klebsiella oxytoca MSB1_2C</b> |               |            |           |           | <b>Klebsiella variicola INF345</b> |               |            |           |           |                  |                  |                    |               |
|-----------------------|-----------------------------------|-----------|-----------|---------------|-----------------------------------|-----------|--------------------|---------------|-----------------------------------|------------------|-----------|------------------|------------------|-----------------------------|------------|------------------|-----------|-----------------------------------|---------------|------------|-----------|-----------|------------------------------------|---------------|------------|-----------|-----------|------------------|------------------|--------------------|---------------|
|                       | chromosome                        | plasmid_1 | plasmid_2 | extra contigs | chromosome                        | plasmid_1 | plasmid_2          | extra contigs | chromosome                        | plasmid_1        | plasmid_2 | plasmid_3        | plasmid_4        | extra contigs               | chromosome | plasmid_1        | plasmid_2 | plasmid_3                         | extra contigs | chromosome | plasmid_1 | plasmid_2 | plasmid_3                          | extra contigs | chromosome | plasmid_1 | plasmid_2 | plasmid_3        | plasmid_4        | plasmid_5          | extra contigs |
| Miniasm/Minipolish    | yes                               | yes       | no        | 0             | yes <sup>1</sup>                  | yes       | yes <sup>2</sup>   | 57            | yes                               | yes              | yes       | yes              | yes <sup>3</sup> | 2                           | yes        | yes <sup>3</sup> | yes       | yes <sup>1</sup>                  | 82            | yes        | yes       | yes       | yes <sup>3</sup>                   | 3             | yes        | yes       | yes       | yes              | yes <sup>3</sup> | yes                | 2             |
| Raven                 | yes                               | yes       | no        | 0             | yes <sup>4</sup>                  | yes       | yes <sup>2,3</sup> | 63            | yes                               | yes <sup>5</sup> | no        | no               | yes <sup>5</sup> | 0                           | yes        | yes              | yes       | no                                | 65            | yes        | yes       | yes       | yes <sup>2</sup>                   | 0             | yes        | yes       | yes       | yes              | yes <sup>2</sup> | yes <sup>2,5</sup> | 0             |
| Flye                  | yes                               | yes       | yes       | 0             | yes                               | yes       | yes <sup>2</sup>   | 0             | yes                               | yes              | yes       | no               | yes              | 1                           | yes        | yes              | yes       | yes                               | 3             | yes        | yes       | yes       | yes                                | 1             | yes        | yes       | yes       | yes <sup>5</sup> | yes <sup>2</sup> | yes                | 0             |
| Tracycler - developer | yes                               | yes       | yes       | 0             | yes                               | yes       | yes                | 0             | yes                               | yes              | yes       | yes              | yes              | 0                           | yes        | yes              | yes       | yes                               | 0             | yes        | yes       | yes       | yes                                | 0             | yes        | yes       | yes       | yes              | yes              | yes                | 0             |
| Tracycler - tester 1  | yes                               | yes       | yes       | 0             | yes                               | yes       | no                 | 0             | yes                               | yes              | yes       | yes              | yes              | 0                           | yes        | yes              | no        | yes                               | 2             | yes        | yes       | yes       | yes                                | 1             | yes        | yes       | yes       | no               | yes              | yes                | 0             |
| Tracycler - tester 2  | yes                               | yes       | yes       | 0             | yes                               | yes       | no                 | 0             | yes                               | no               | yes       | yes              | yes              | 0                           | yes        | yes              | yes       | yes                               | 4             | yes        | yes       | yes       | yes                                | 1             | yes        | yes       | yes       | no               | yes              | yes                | 0             |
| Tracycler - tester 3  | yes                               | yes       | yes       | 0             | yes                               | yes       | yes                | 0             | yes                               | yes              | yes       | yes              | no               | 0                           | yes        | yes              | no        | yes                               | 2             | yes        | yes       | yes       | yes                                | 1             | yes        | yes       | yes       | no               | yes              | yes                | 0             |
| Tracycler - tester 4  | yes                               | yes       | yes       | 0             | yes                               | yes       | yes                | 0             | yes                               | yes              | yes       | yes              | no               | 0                           | yes        | yes              | no        | no                                | 0             | yes        | yes       | yes       | yes                                | 1             | yes        | yes       | yes       | yes              | yes              | yes                | 0             |
| Tracycler - tester 5  | yes                               | yes       | yes       | 0             | yes                               | yes       | no                 | 0             | yes                               | yes              | yes       | yes <sup>6</sup> | yes <sup>6</sup> | 0                           | yes        | yes              | no        | no                                | 3             | yes        | yes       | yes       | yes                                | 1             | yes        | yes       | yes       | no               | no               | yes                | 0             |

1. Contig was too long and not circularised.
2. Multiple copies of the small plasmid sequence in one contig.
3. The assembly contains multiple redundant contigs for this plasmid, some/all of which failed to circularised well.
4. Contig was too short because some chunks of the chromosome ended up in separate contigs.
5. Contig contains misassemblies
6. The assembly contained a correct contig for this plasmid, but it also contained a misassembled contig which contains large pieces of plasmid 3 and plasmid 4.

# Tracycler vs Tracycler

| Genome/replicon                        | Replicon size | Assembly 1 | Assembly 2 | Substitutions | 1 bp homopolymer indels | 1 bp non-homopolymer indels | 2 bp homopolymer indels | 2 bp non-homopolymer indels | 3 bp homopolymer indels | 3 bp non-homopolymer indels | 4 bp non-homopolymer indels |
|----------------------------------------|---------------|------------|------------|---------------|-------------------------|-----------------------------|-------------------------|-----------------------------|-------------------------|-----------------------------|-----------------------------|
| Acinetobacter_baumannii_99_chromosome  | 3798645       | tester_1   | tester_2   | 4             | 216                     | 8                           | 1                       | 0                           | 0                       | 0                           | 0                           |
| Acinetobacter_baumannii_99_chromosome  | 3798645       | tester_1   | tester_3   | 3             | 160                     | 9                           | 0                       | 0                           | 0                       | 0                           | 0                           |
| Acinetobacter_baumannii_99_chromosome  | 3798645       | tester_1   | tester_4   | 3             | 212                     | 7                           | 0                       | 0                           | 0                       | 0                           | 0                           |
| Acinetobacter_baumannii_99_chromosome  | 3798645       | tester_1   | tester_5   | 1             | 205                     | 10                          | 0                       | 0                           | 1                       | 0                           | 0                           |
| Acinetobacter_baumannii_99_chromosome  | 3798645       | tester_1   | developer  | 2             | 271                     | 18                          | 0                       | 1                           | 0                       | 0                           | 0                           |
| Acinetobacter_baumannii_99_chromosome  | 3798645       | tester_2   | tester_3   | 3             | 194                     | 3                           | 1                       | 0                           | 0                       | 0                           | 0                           |
| Acinetobacter_baumannii_99_chromosome  | 3798645       | tester_2   | tester_4   | 3             | 140                     | 3                           | 0                       | 0                           | 0                       | 0                           | 0                           |
| Acinetobacter_baumannii_99_chromosome  | 3798645       | tester_2   | tester_5   | 2             | 239                     | 8                           | 2                       | 0                           | 1                       | 0                           | 0                           |
| Acinetobacter_baumannii_99_chromosome  | 3798645       | tester_2   | developer  | 4             | 319                     | 12                          | 0                       | 1                           | 0                       | 0                           | 0                           |
| Acinetobacter_baumannii_99_chromosome  | 3798645       | tester_3   | tester_4   | 4             | 196                     | 4                           | 0                       | 0                           | 0                       | 0                           | 0                           |
| Acinetobacter_baumannii_99_chromosome  | 3798645       | tester_3   | tester_5   | 3             | 210                     | 11                          | 1                       | 0                           | 0                       | 0                           | 0                           |
| Acinetobacter_baumannii_99_chromosome  | 3798645       | tester_3   | developer  | 3             | 267                     | 15                          | 0                       | 1                           | 0                       | 0                           | 0                           |
| Acinetobacter_baumannii_99_chromosome  | 3798645       | tester_4   | tester_5   | 0             | 258                     | 10                          | 1                       | 0                           | 1                       | 0                           | 0                           |
| Acinetobacter_baumannii_99_chromosome  | 3798645       | tester_4   | developer  | 5             | 319                     | 13                          | 0                       | 1                           | 0                       | 0                           | 0                           |
| Acinetobacter_baumannii_99_chromosome  | 3798645       | tester_5   | developer  | 4             | 293                     | 12                          | 2                       | 1                           | 0                       | 0                           | 0                           |
| Citrobacter_koseri_MINF_9D_chromosome  | 4758907       | tester_1   | tester_2   | 8             | 372                     | 48                          | 2                       | 0                           | 0                       | 0                           | 0                           |
| Citrobacter_koseri_MINF_9D_chromosome  | 4758907       | tester_1   | tester_3   | 4             | 211                     | 25                          | 1                       | 0                           | 0                       | 0                           | 0                           |
| Citrobacter_koseri_MINF_9D_chromosome  | 4758907       | tester_1   | tester_4   | 9             | 324                     | 39                          | 3                       | 0                           | 1                       | 0                           | 0                           |
| Citrobacter_koseri_MINF_9D_chromosome  | 4758907       | tester_1   | tester_5   | 4             | 291                     | 46                          | 2                       | 0                           | 0                       | 0                           | 0                           |
| Citrobacter_koseri_MINF_9D_chromosome  | 4758907       | tester_1   | developer  | 17            | 422                     | 45                          | 2                       | 0                           | 0                       | 0                           | 0                           |
| Citrobacter_koseri_MINF_9D_chromosome  | 4758907       | tester_2   | tester_3   | 8             | 371                     | 47                          | 2                       | 0                           | 0                       | 0                           | 0                           |
| Citrobacter_koseri_MINF_9D_chromosome  | 4758907       | tester_2   | tester_4   | 13            | 448                     | 58                          | 6                       | 0                           | 0                       | 0                           | 0                           |
| Citrobacter_koseri_MINF_9D_chromosome  | 4758907       | tester_2   | tester_5   | 10            | 398                     | 51                          | 1                       | 0                           | 0                       | 0                           | 0                           |
| Citrobacter_koseri_MINF_9D_chromosome  | 4758907       | tester_2   | developer  | 20            | 571                     | 62                          | 3                       | 0                           | 0                       | 0                           | 0                           |
| Citrobacter_koseri_MINF_9D_chromosome  | 4758907       | tester_3   | tester_4   | 8             | 312                     | 38                          | 2                       | 0                           | 0                       | 0                           | 0                           |
| Citrobacter_koseri_MINF_9D_chromosome  | 4758907       | tester_3   | tester_5   | 7             | 270                     | 39                          | 0                       | 0                           | 0                       | 0                           | 0                           |
| Citrobacter_koseri_MINF_9D_chromosome  | 4758907       | tester_3   | developer  | 19            | 375                     | 48                          | 0                       | 0                           | 0                       | 0                           | 0                           |
| Citrobacter_koseri_MINF_9D_chromosome  | 4758907       | tester_4   | tester_5   | 7             | 334                     | 43                          | 1                       | 0                           | 0                       | 0                           | 0                           |
| Citrobacter_koseri_MINF_9D_chromosome  | 4758907       | tester_4   | developer  | 15            | 445                     | 52                          | 1                       | 0                           | 0                       | 0                           | 0                           |
| Citrobacter_koseri_MINF_9D_chromosome  | 4758907       | tester_5   | developer  | 13            | 426                     | 48                          | 0                       | 0                           | 0                       | 0                           | 0                           |
| Enterobacter_kobei_MSB1_1B_chromosome  | 4837926       | tester_1   | tester_2   | 108           | 307                     | 237                         | 0                       | 5                           | 0                       | 0                           | 0                           |
| Enterobacter_kobei_MSB1_1B_chromosome  | 4837926       | tester_1   | tester_3   | 113           | 233                     | 142                         | 0                       | 1                           | 0                       | 0                           | 0                           |
| Enterobacter_kobei_MSB1_1B_chromosome  | 4837926       | tester_1   | tester_4   | 127           | 230                     | 143                         | 0                       | 5                           | 0                       | 0                           | 0                           |
| Enterobacter_kobei_MSB1_1B_chromosome  | 4837926       | tester_1   | tester_5   | 145           | 332                     | 213                         | 0                       | 2                           | 0                       | 0                           | 0                           |
| Enterobacter_kobei_MSB1_1B_chromosome  | 4837926       | tester_1   | developer  | 200           | 455                     | 226                         | 1                       | 3                           | 0                       | 0                           | 0                           |
| Enterobacter_kobei_MSB1_1B_chromosome  | 4837926       | tester_2   | tester_3   | 109           | 314                     | 255                         | 1                       | 4                           | 0                       | 0                           | 0                           |
| Enterobacter_kobei_MSB1_1B_chromosome  | 4837926       | tester_2   | tester_4   | 112           | 335                     | 242                         | 1                       | 3                           | 0                       | 0                           | 0                           |
| Enterobacter_kobei_MSB1_1B_chromosome  | 4837926       | tester_2   | tester_5   | 139           | 384                     | 265                         | 1                       | 5                           | 0                       | 0                           | 0                           |
| Enterobacter_kobei_MSB1_1B_chromosome  | 4837926       | tester_2   | developer  | 164           | 533                     | 320                         | 2                       | 4                           | 0                       | 0                           | 0                           |
| Enterobacter_kobei_MSB1_1B_chromosome  | 4837926       | tester_3   | tester_4   | 127           | 242                     | 142                         | 0                       | 3                           | 0                       | 0                           | 0                           |
| Enterobacter_kobei_MSB1_1B_chromosome  | 4837926       | tester_3   | tester_5   | 127           | 271                     | 189                         | 0                       | 0                           | 0                       | 0                           | 0                           |
| Enterobacter_kobei_MSB1_1B_chromosome  | 4837926       | tester_3   | developer  | 178           | 438                     | 208                         | 1                       | 1                           | 0                       | 0                           | 0                           |
| Enterobacter_kobei_MSB1_1B_chromosome  | 4837926       | tester_4   | tester_5   | 140           | 335                     | 183                         | 0                       | 4                           | 0                       | 0                           | 0                           |
| Enterobacter_kobei_MSB1_1B_chromosome  | 4837926       | tester_4   | developer  | 170           | 453                     | 213                         | 1                       | 4                           | 0                       | 0                           | 0                           |
| Enterobacter_kobei_MSB1_1B_chromosome  | 4837926       | tester_5   | developer  | 182           | 459                     | 237                         | 1                       | 1                           | 0                       | 0                           | 0                           |
| Haemophilus_M1C132_1_chromosome        | 2051886       | tester_1   | tester_2   | 5             | 172                     | 41                          | 0                       | 8                           | 0                       | 1                           | 0                           |
| Haemophilus_M1C132_1_chromosome        | 2051886       | tester_1   | tester_3   | 3             | 149                     | 33                          | 0                       | 5                           | 0                       | 0                           | 1                           |
| Haemophilus_M1C132_1_chromosome        | 2051886       | tester_1   | tester_4   | 9             | 180                     | 44                          | 1                       | 11                          | 0                       | 0                           | 0                           |
| Haemophilus_M1C132_1_chromosome        | 2051886       | tester_1   | tester_5   | 4             | 148                     | 40                          | 1                       | 8                           | 0                       | 0                           | 0                           |
| Haemophilus_M1C132_1_chromosome        | 2051886       | tester_1   | developer  | 4             | 232                     | 53                          | 3                       | 10                          | 0                       | 0                           | 1                           |
| Haemophilus_M1C132_1_chromosome        | 2051886       | tester_2   | tester_3   | 5             | 208                     | 45                          | 0                       | 10                          | 0                       | 1                           | 1                           |
| Haemophilus_M1C132_1_chromosome        | 2051886       | tester_2   | tester_4   | 10            | 218                     | 43                          | 0                       | 14                          | 0                       | 1                           | 0                           |
| Haemophilus_M1C132_1_chromosome        | 2051886       | tester_2   | tester_5   | 4             | 146                     | 43                          | 0                       | 3                           | 0                       | 1                           | 0                           |
| Haemophilus_M1C132_1_chromosome        | 2051886       | tester_2   | developer  | 5             | 238                     | 56                          | 1                       | 7                           | 0                       | 1                           | 1                           |
| Haemophilus_M1C132_1_chromosome        | 2051886       | tester_3   | tester_4   | 8             | 173                     | 43                          | 1                       | 9                           | 0                       | 0                           | 1                           |
| Haemophilus_M1C132_1_chromosome        | 2051886       | tester_3   | tester_5   | 1             | 126                     | 26                          | 0                       | 10                          | 0                       | 0                           | 1                           |
| Haemophilus_M1C132_1_chromosome        | 2051886       | tester_3   | developer  | 2             | 204                     | 45                          | 2                       | 11                          | 0                       | 0                           | 0                           |
| Haemophilus_M1C132_1_chromosome        | 2051886       | tester_4   | tester_5   | 6             | 162                     | 34                          | 1                       | 11                          | 0                       | 0                           | 0                           |
| Haemophilus_M1C132_1_chromosome        | 2051886       | tester_4   | developer  | 8             | 212                     | 47                          | 6                       | 14                          | 0                       | 0                           | 1                           |
| Haemophilus_M1C132_1_chromosome        | 2051886       | tester_5   | developer  | 1             | 186                     | 39                          | 2                       | 7                           | 0                       | 0                           | 1                           |
| Klebsiella_oxytoca_MSB1_2C_chromosome  | 5804453       | tester_1   | tester_2   | 3             | 289                     | 8                           | 1                       | 1                           | 0                       | 0                           | 0                           |
| Klebsiella_oxytoca_MSB1_2C_chromosome  | 5804453       | tester_1   | tester_3   | 7             | 478                     | 9                           | 3                       | 2                           | 0                       | 0                           | 0                           |
| Klebsiella_oxytoca_MSB1_2C_chromosome  | 5804453       | tester_1   | tester_4   | 5             | 325                     | 5                           | 0                       | 2                           | 0                       | 0                           | 0                           |
| Klebsiella_oxytoca_MSB1_2C_chromosome  | 5804453       | tester_1   | tester_5   | 7             | 367                     | 12                          | 1                       | 1                           | 0                       | 0                           | 0                           |
| Klebsiella_oxytoca_MSB1_2C_chromosome  | 5804453       | tester_1   | developer  | 5             | 490                     | 9                           | 1                       | 4                           | 0                       | 0                           | 0                           |
| Klebsiella_oxytoca_MSB1_2C_chromosome  | 5804453       | tester_2   | tester_3   | 6             | 403                     | 9                           | 0                       | 1                           | 0                       | 0                           | 0                           |
| Klebsiella_oxytoca_MSB1_2C_chromosome  | 5804453       | tester_2   | tester_4   | 1             | 245                     | 8                           | 1                       | 1                           | 0                       | 0                           | 0                           |
| Klebsiella_oxytoca_MSB1_2C_chromosome  | 5804453       | tester_2   | tester_5   | 6             | 302                     | 8                           | 1                       | 0                           | 0                       | 0                           | 0                           |
| Klebsiella_oxytoca_MSB1_2C_chromosome  | 5804453       | tester_2   | developer  | 4             | 437                     | 11                          | 3                       | 3                           | 0                       | 0                           | 0                           |
| Klebsiella_oxytoca_MSB1_2C_chromosome  | 5804453       | tester_3   | tester_4   | 6             | 369                     | 4                           | 1                       | 2                           | 0                       | 0                           | 0                           |
| Klebsiella_oxytoca_MSB1_2C_chromosome  | 5804453       | tester_3   | tester_5   | 3             | 389                     | 9                           | 1                       | 1                           | 0                       | 0                           | 0                           |
| Klebsiella_oxytoca_MSB1_2C_chromosome  | 5804453       | tester_3   | developer  | 6             | 518                     | 8                           | 2                       | 4                           | 0                       | 0                           | 0                           |
| Klebsiella_oxytoca_MSB1_2C_chromosome  | 5804453       | tester_4   | tester_5   | 8             | 322                     | 9                           | 1                       | 1                           | 0                       | 0                           | 0                           |
| Klebsiella_oxytoca_MSB1_2C_chromosome  | 5804453       | tester_4   | developer  | 6             | 433                     | 6                           | 3                       | 4                           | 0                       | 0                           | 0                           |
| Klebsiella_oxytoca_MSB1_2C_chromosome  | 5804453       | tester_5   | developer  | 3             | 429                     | 9                           | 3                       | 3                           | 0                       | 0                           | 0                           |
| Klebsiella_variicola_INF345_chromosome | 5417034       | tester_1   | tester_2   | 25            | 260                     | 17                          | 0                       | 0                           | 0                       | 0                           | 0                           |
| Klebsiella_variicola_INF345_chromosome | 5417034       | tester_1   | tester_3   | 22            | 537                     | 22                          | 1                       | 4                           | 0                       | 0                           | 0                           |
| Klebsiella_variicola_INF345_chromosome | 5417034       | tester_1   | tester_4   | 20            | 505                     | 33                          | 0                       | 2                           | 0                       | 0                           | 0                           |
| Klebsiella_variicola_INF345_chromosome | 5417034       | tester_1   | tester_5   | 21            | 563                     | 33                          | 2                       | 6                           | 0                       | 0                           | 0                           |
| Klebsiella_variicola_INF345_chromosome | 5417034       | tester_1   | developer  | 24            | 532                     | 37                          | 0                       | 7                           | 0                       | 0                           | 0                           |
| Klebsiella_variicola_INF345_chromosome | 5417034       | tester_2   | tester_3   | 20            | 549                     | 27                          | 1                       | 4                           | 0                       | 0                           | 0                           |
| Klebsiella_variicola_INF345_chromosome | 5417034       | tester_2   | tester_4   | 28            | 550                     | 31                          | 0                       | 3                           | 0                       | 0                           | 0                           |
| Klebsiella_variicola_INF345_chromosome | 5417034       | tester_2   | tester_5   | 20            | 610                     | 29                          | 2                       | 7                           | 0                       | 0                           | 0                           |
| Klebsiella_variicola_INF345_chromosome | 5417034       | tester_2   | developer  | 31            | 556                     | 36                          | 0                       | 6                           | 0                       | 0                           | 0                           |
| Klebsiella_variicola_INF345_chromosome | 5417034       | tester_3   | tester_4   | 15            | 420                     | 19                          | 1                       | 3                           | 0                       | 0                           | 0                           |
| Klebsiella_variicola_INF345_chromosome | 5417034       | tester_3   | tester_5   | 6             | 389                     | 16                          | 2                       | 4                           | 0                       | 0                           | 0                           |
| Klebsiella_variicola_INF345_chromosome | 5417034       | tester_3   | developer  | 20            | 620                     | 20                          | 0                       | 5                           | 0                       | 0                           | 0                           |
| Klebsiella_variicola_INF345_chromosome | 5417034       | tester_4   | tester_5   | 16            | 479                     | 29                          | 3                       | 4                           | 0                       | 0                           | 0                           |
| Klebsiella_variicola_INF345_chromosome | 5417034       | tester_4   | developer  | 29            | 645                     | 30                          | 0                       | 5                           | 0                       | 0                           | 0                           |
| Klebsiella_variicola_INF345_chromosome | 5417034       | tester_5   | developer  | 23            | 626                     | 25                          | 1                       | 4                           | 0                       | 0                           | 0                           |

|                      |              |               |               |              |              |              |              |              |
|----------------------|--------------|---------------|---------------|--------------|--------------|--------------|--------------|--------------|
| <b>Totals:</b>       | <b>2818</b>  | <b>30781</b>  | <b>5207</b>   | <b>96</b>    | <b>282</b>   | <b>4</b>     | <b>5</b>     | <b>8</b>     |
| <b>Proportions:</b>  | <b>7.19%</b> | <b>78.52%</b> | <b>13.28%</b> | <b>0.24%</b> | <b>0.72%</b> | <b>0.01%</b> | <b>0.01%</b> | <b>0.02%</b> |
| <b>Rate per Mbp:</b> | <b>6.63</b>  | <b>77.55</b>  | <b>13.90</b>  | <b>0.27</b>  | <b>1.05</b>  | <b>0.01</b>  | <b>0.03</b>  | <b>0.04</b>  |

# Trycycler vs polished

| Genome/replicon                        | Replicon size | Assembly 1    | Assembly 2   | Substitutions | 1 bp homopolymer indels | 1 bp non-homopolymer indels | 2 bp homopolymer indels | 2 bp non-homopolymer indels | 3 bp homopolymer indels | 3 bp non-homopolymer indels | 4 bp homopolymer indels | 4 bp non-homopolymer indels | 5 bp homopolymer indels | 5 bp non-homopolymer indels | 6 bp homopolymer indels | 6 bp non-homopolymer indels | 7 bp homopolymer indels | 7 bp non-homopolymer indels | 8 bp homopolymer indels | 8 bp non-homopolymer indels | 9 bp homopolymer indels | 9 bp non-homopolymer indels | 12 bp homopolymer indels | 13 bp homopolymer indels | 16 bp homopolymer indels | methylation motif errors | non-methylation motif errors |   |
|----------------------------------------|---------------|---------------|--------------|---------------|-------------------------|-----------------------------|-------------------------|-----------------------------|-------------------------|-----------------------------|-------------------------|-----------------------------|-------------------------|-----------------------------|-------------------------|-----------------------------|-------------------------|-----------------------------|-------------------------|-----------------------------|-------------------------|-----------------------------|--------------------------|--------------------------|--------------------------|--------------------------|------------------------------|---|
| Acinetobacter_baumannii_J9_chromosome  | 3798645       | tester_1      | polished     | 2             | 764                     | 6                           | 27                      | 0                           | 2                       | 0                           | 0                       | 0                           | 0                       | 0                           | 0                       | 0                           | 0                       | 0                           | 0                       | 0                           | 0                       | 0                           | 0                        | 0                        | 0                        | 1                        | 7                            |   |
| Acinetobacter_baumannii_J9_chromosome  | 3798645       | tester_2      | polished     | 3             | 734                     | 4                           | 23                      | 0                           | 2                       | 0                           | 0                       | 0                           | 0                       | 0                           | 0                       | 0                           | 0                       | 0                           | 0                       | 0                           | 0                       | 0                           | 0                        | 0                        | 0                        | 0                        | 0                            | 7 |
| Acinetobacter_baumannii_J9_chromosome  | 3798645       | tester_3      | polished     | 5             | 728                     | 6                           | 26                      | 0                           | 1                       | 0                           | 0                       | 0                           | 0                       | 0                           | 0                       | 0                           | 0                       | 0                           | 0                       | 0                           | 0                       | 0                           | 0                        | 0                        | 0                        | 1                        | 10                           |   |
| Acinetobacter_baumannii_J9_chromosome  | 3798645       | tester_4      | polished     | 1             | 713                     | 4                           | 22                      | 0                           | 2                       | 0                           | 0                       | 0                           | 0                       | 0                           | 0                       | 0                           | 0                       | 0                           | 0                       | 0                           | 0                       | 0                           | 0                        | 0                        | 0                        | 0                        | 5                            |   |
| Acinetobacter_baumannii_J9_chromosome  | 3798645       | tester_5      | polished     | 0             | 727                     | 8                           | 23                      | 0                           | 1                       | 0                           | 0                       | 0                           | 0                       | 0                           | 0                       | 0                           | 0                       | 0                           | 0                       | 0                           | 0                       | 0                           | 0                        | 0                        | 0                        | 1                        | 7                            |   |
| Acinetobacter_baumannii_J9_chromosome  | 3798645       | developer     | polished     | 3             | 845                     | 14                          | 33                      | 1                           | 0                       | 0                           | 0                       | 0                           | 0                       | 0                           | 0                       | 0                           | 0                       | 0                           | 0                       | 0                           | 0                       | 0                           | 0                        | 0                        | 0                        | 1                        | 17                           |   |
| Citrobacter_koseri_MINF_9D_chromosome  | 4758907       | tester_1      | polished     | 10            | 1201                    | 81                          | 68                      | 1                           | 11                      | 0                           | 0                       | 0                           | 0                       | 0                           | 0                       | 0                           | 0                       | 0                           | 0                       | 0                           | 0                       | 0                           | 0                        | 0                        | 0                        | 1                        | 91                           |   |
| Citrobacter_koseri_MINF_9D_chromosome  | 4758907       | tester_2      | polished     | 12            | 1206                    | 99                          | 61                      | 1                           | 8                       | 0                           | 0                       | 0                           | 0                       | 0                           | 0                       | 0                           | 0                       | 0                           | 0                       | 0                           | 0                       | 0                           | 0                        | 0                        | 0                        | 1                        | 111                          |   |
| Citrobacter_koseri_MINF_9D_chromosome  | 4758907       | tester_3      | polished     | 9             | 1094                    | 86                          | 59                      | 1                           | 9                       | 0                           | 0                       | 0                           | 0                       | 0                           | 0                       | 0                           | 0                       | 0                           | 0                       | 0                           | 0                       | 0                           | 0                        | 0                        | 0                        | 1                        | 95                           |   |
| Citrobacter_koseri_MINF_9D_chromosome  | 4758907       | tester_4      | polished     | 14            | 1096                    | 80                          | 63                      | 1                           | 7                       | 0                           | 0                       | 0                           | 0                       | 0                           | 0                       | 0                           | 0                       | 0                           | 0                       | 0                           | 0                       | 0                           | 0                        | 0                        | 0                        | 1                        | 94                           |   |
| Citrobacter_koseri_MINF_9D_chromosome  | 4758907       | tester_5      | polished     | 13            | 1170                    | 73                          | 62                      | 1                           | 7                       | 0                           | 0                       | 0                           | 0                       | 0                           | 0                       | 0                           | 0                       | 0                           | 0                       | 0                           | 0                       | 0                           | 0                        | 0                        | 0                        | 1                        | 86                           |   |
| Citrobacter_koseri_MINF_9D_chromosome  | 4758907       | developer     | polished     | 15            | 1068                    | 76                          | 61                      | 1                           | 4                       | 0                           | 0                       | 0                           | 0                       | 0                           | 0                       | 0                           | 0                       | 0                           | 0                       | 0                           | 0                       | 0                           | 0                        | 0                        | 0                        | 1                        | 91                           |   |
| Enterobacter_kobei_MSB1_1B_chromosome  | 4837926       | tester_1      | polished     | 299           | 1284                    | 540                         | 83                      | 2                           | 4                       | 0                           | 1                       | 0                           | 0                       | 0                           | 0                       | 0                           | 0                       | 0                           | 0                       | 0                           | 0                       | 0                           | 0                        | 0                        | 0                        | 0                        | 841                          |   |
| Enterobacter_kobei_MSB1_1B_chromosome  | 4837926       | tester_2      | polished     | 223           | 1326                    | 582                         | 88                      | 4                           | 5                       | 0                           | 0                       | 0                           | 1                       | 0                           | 0                       | 0                           | 0                       | 0                           | 0                       | 0                           | 0                       | 0                           | 0                        | 0                        | 0                        | 0                        | 809                          |   |
| Enterobacter_kobei_MSB1_1B_chromosome  | 4837926       | tester_3      | polished     | 318           | 1303                    | 537                         | 82                      | 0                           | 3                       | 0                           | 1                       | 0                           | 0                       | 0                           | 0                       | 0                           | 0                       | 0                           | 0                       | 0                           | 0                       | 0                           | 0                        | 0                        | 0                        | 0                        | 855                          |   |
| Enterobacter_kobei_MSB1_1B_chromosome  | 4837926       | tester_4      | polished     | 293           | 1251                    | 543                         | 91                      | 5                           | 5                       | 0                           | 1                       | 0                           | 0                       | 0                           | 0                       | 0                           | 0                       | 0                           | 0                       | 0                           | 0                       | 0                           | 0                        | 0                        | 0                        | 0                        | 841                          |   |
| Enterobacter_kobei_MSB1_1B_chromosome  | 4837926       | tester_5      | polished     | 283           | 1368                    | 573                         | 90                      | 0                           | 4                       | 0                           | 1                       | 0                           | 0                       | 0                           | 0                       | 0                           | 0                       | 0                           | 0                       | 0                           | 0                       | 0                           | 0                        | 0                        | 0                        | 0                        | 856                          |   |
| Enterobacter_kobei_MSB1_1B_chromosome  | 4837926       | developer     | polished     | 284           | 1352                    | 599                         | 78                      | 1                           | 7                       | 0                           | 0                       | 0                           | 1                       | 0                           | 0                       | 0                           | 0                       | 0                           | 0                       | 0                           | 0                       | 0                           | 0                        | 0                        | 0                        | 1                        | 883                          |   |
| Haemophilus_M1C132_1_chromosome        | 2051886       | tester_1      | polished     | 3             | 432                     | 43                          | 15                      | 15                          | 2                       | 0                           | 0                       | 1                           | 0                       | 0                           | 0                       | 0                           | 0                       | 0                           | 0                       | 0                           | 0                       | 0                           | 0                        | 0                        | 0                        | 0                        | 62                           |   |
| Haemophilus_M1C132_1_chromosome        | 2051886       | tester_2      | polished     | 4             | 425                     | 54                          | 17                      | 6                           | 3                       | 1                           | 0                       | 0                           | 0                       | 0                           | 0                       | 0                           | 0                       | 0                           | 0                       | 0                           | 0                       | 0                           | 0                        | 0                        | 0                        | 0                        | 66                           |   |
| Haemophilus_M1C132_1_chromosome        | 2051886       | tester_3      | polished     | 1             | 372                     | 41                          | 16                      | 21                          | 2                       | 0                           | 0                       | 0                           | 0                       | 0                           | 0                       | 0                           | 0                       | 0                           | 0                       | 0                           | 0                       | 0                           | 0                        | 0                        | 0                        | 0                        | 63                           |   |
| Haemophilus_M1C132_1_chromosome        | 2051886       | tester_4      | polished     | 6             | 388                     | 53                          | 14                      | 23                          | 2                       | 0                           | 0                       | 1                           | 0                       | 0                           | 0                       | 0                           | 0                       | 0                           | 0                       | 0                           | 0                       | 0                           | 0                        | 0                        | 0                        | 0                        | 83                           |   |
| Haemophilus_M1C132_1_chromosome        | 2051886       | tester_5      | polished     | 0             | 381                     | 47                          | 15                      | 9                           | 1                       | 0                           | 0                       | 0                           | 0                       | 0                           | 0                       | 0                           | 0                       | 0                           | 0                       | 0                           | 0                       | 0                           | 0                        | 0                        | 0                        | 0                        | 57                           |   |
| Haemophilus_M1C132_1_chromosome        | 2051886       | developer     | polished     | 1             | 407                     | 40                          | 17                      | 10                          | 3                       | 0                           | 0                       | 0                           | 0                       | 0                           | 0                       | 0                           | 0                       | 0                           | 0                       | 0                           | 0                       | 0                           | 0                        | 0                        | 0                        | 0                        | 51                           |   |
| Klebsiella_oxytoca_MSB1_2C_chromosome  | 5804453       | tester_1      | polished     | 4             | 1738                    | 18                          | 118                     | 5                           | 7                       | 0                           | 1                       | 0                           | 0                       | 0                           | 0                       | 0                           | 0                       | 0                           | 0                       | 0                           | 0                       | 0                           | 0                        | 0                        | 0                        | 3                        | 24                           |   |
| Klebsiella_oxytoca_MSB1_2C_chromosome  | 5804453       | tester_2      | polished     | 2             | 1611                    | 14                          | 104                     | 4                           | 7                       | 0                           | 0                       | 0                           | 0                       | 0                           | 0                       | 0                           | 0                       | 0                           | 0                       | 0                           | 0                       | 0                           | 0                        | 0                        | 0                        | 3                        | 17                           |   |
| Klebsiella_oxytoca_MSB1_2C_chromosome  | 5804453       | tester_3      | polished     | 2             | 1612                    | 16                          | 95                      | 3                           | 8                       | 0                           | 0                       | 0                           | 0                       | 0                           | 0                       | 0                           | 0                       | 0                           | 0                       | 0                           | 0                       | 0                           | 0                        | 0                        | 0                        | 3                        | 18                           |   |
| Klebsiella_oxytoca_MSB1_2C_chromosome  | 5804453       | tester_4      | polished     | 2             | 1562                    | 15                          | 99                      | 3                           | 6                       | 0                           | 0                       | 0                           | 0                       | 0                           | 0                       | 0                           | 0                       | 0                           | 0                       | 0                           | 0                       | 0                           | 0                        | 0                        | 0                        | 3                        | 17                           |   |
| Klebsiella_oxytoca_MSB1_2C_chromosome  | 5804453       | tester_5      | polished     | 4             | 1554                    | 9                           | 102                     | 4                           | 7                       | 0                           | 0                       | 0                           | 0                       | 0                           | 0                       | 0                           | 0                       | 0                           | 0                       | 0                           | 0                       | 0                           | 0                        | 0                        | 0                        | 2                        | 15                           |   |
| Klebsiella_oxytoca_MSB1_2C_chromosome  | 5804453       | developer     | polished     | 4             | 1568                    | 13                          | 98                      | 7                           | 7                       | 0                           | 1                       | 0                           | 0                       | 0                           | 0                       | 0                           | 0                       | 0                           | 0                       | 0                           | 0                       | 0                           | 0                        | 0                        | 0                        | 3                        | 21                           |   |
| Klebsiella_variicola_INF345_chromosome | 5417034       | tester_1      | polished     | 22            | 1967                    | 44                          | 110                     | 13                          | 9                       | 5                           | 1                       | 8                           | 1                       | 2                           | 4                       | 2                           | 3                       | 3                           | 1                       | 1                           | 1                       | 1                           | 1                        | 1                        | 1                        | 1                        | 108                          |   |
| Klebsiella_variicola_INF345_chromosome | 5417034       | tester_2      | polished     | 22            | 2005                    | 47                          | 124                     | 14                          | 7                       | 5                           | 1                       | 8                           | 1                       | 2                           | 4                       | 2                           | 3                       | 3                           | 1                       | 1                           | 1                       | 1                           | 1                        | 1                        | 1                        | 2                        | 111                          |   |
| Klebsiella_variicola_INF345_chromosome | 5417034       | tester_3      | polished     | 5             | 1632                    | 26                          | 89                      | 10                          | 7                       | 5                           | 0                       | 8                           | 1                       | 2                           | 4                       | 2                           | 3                       | 3                           | 1                       | 1                           | 1                       | 1                           | 1                        | 1                        | 1                        | 0                        | 71                           |   |
| Klebsiella_variicola_INF345_chromosome | 5417034       | tester_4      | polished     | 13            | 1720                    | 42                          | 91                      | 11                          | 4                       | 5                           | 0                       | 8                           | 1                       | 2                           | 4                       | 2                           | 3                       | 3                           | 1                       | 1                           | 1                       | 1                           | 1                        | 1                        | 1                        | 0                        | 96                           |   |
| Klebsiella_variicola_INF345_chromosome | 5417034       | tester_5      | polished     | 5             | 1604                    | 38                          | 88                      | 12                          | 7                       | 5                           | 1                       | 8                           | 0                       | 2                           | 4                       | 2                           | 3                       | 3                           | 1                       | 1                           | 1                       | 1                           | 1                        | 1                        | 1                        | 2                        | 83                           |   |
| Klebsiella_variicola_INF345_chromosome | 5417034       | developer     | polished     | 21            | 1945                    | 38                          | 118                     | 12                          | 8                       | 5                           | 0                       | 8                           | 1                       | 2                           | 4                       | 2                           | 3                       | 3                           | 1                       | 1                           | 1                       | 1                           | 1                        | 1                        | 1                        | 0                        | 101                          |   |
| <b>Totals:</b>                         | <b>1908</b>   | <b>42153</b>  | <b>4509</b>  | <b>2370</b>   | <b>201</b>              | <b>179</b>                  | <b>31</b>               | <b>9</b>                    | <b>52</b>               | <b>7</b>                    | <b>12</b>               | <b>24</b>                   | <b>12</b>               | <b>18</b>                   | <b>18</b>               | <b>6</b>                    | <b>6</b>                | <b>6</b>                    | <b>33</b>               | <b>6770</b>                 |                         |                             |                          |                          |                          |                          |                              |   |
| <b>Proportions:</b>                    | <b>3.70%</b>  | <b>81.82%</b> | <b>8.75%</b> | <b>4.60%</b>  | <b>0.39%</b>            | <b>0.35%</b>                | <b>0.06%</b>            | <b>0.02%</b>                | <b>0.10%</b>            | <b>0.01%</b>                | <b>0.02%</b>            | <b>0.05%</b>                | <b>0.02%</b>            | <b>0.03%</b>                | <b>0.03%</b>            | <b>0.01%</b>                | <b>0.01%</b>            | <b>0.01%</b>                | <b>0.49%</b>            | <b>99.51%</b>               |                         |                             |                          |                          |                          |                          |                              |   |
| <b>Rate per Mbp:</b>                   | <b>11.03</b>  | <b>252.62</b> | <b>27.94</b> | <b>13.65</b>  | <b>1.74</b>             | <b>1.08</b>                 | <b>0.17</b>             | <b>0.05</b>                 | <b>0.30</b>             | <b>0.04</b>                 | <b>0.06</b>             | <b>0.12</b>                 | <b>0.06</b>             | <b>0.09</b>                 | <b>0.09</b>             | <b>0.03</b>                 | <b>0.03</b>             | <b>0.03</b>                 | <b>0.18</b>             | <b>41.53</b>                |                         |                             |                          |                          |                          |                          |                              |   |

# Other vs other

| Genome/replicon                        | Replicon size | Assembly 1 | Assembly 2 | Substitutions | 1 bp homopolymer indels | 1 bp non-homopolymer indels | 2 bp homopolymer indels | 2 bp non-homopolymer indels | 3 bp homopolymer indels | 3 bp non-homopolymer indels | 4 bp homopolymer indels | 4 bp non-homopolymer indels | 5 bp non-homopolymer indels | 6 bp non-homopolymer indels | 7 bp non-homopolymer indels | 8 bp non-homopolymer indels | 9 bp non-homopolymer indels | 10 bp non-homopolymer indels | 11 bp non-homopolymer indels | 12 bp non-homopolymer indels | 13 bp non-homopolymer indels | 14 bp non-homopolymer indels | 15 bp non-homopolymer indels | 16 bp non-homopolymer indels | 17 bp non-homopolymer indels | 18 bp non-homopolymer indels | 19 bp non-homopolymer indels | 20 bp non-homopolymer indels | 21 bp non-homopolymer indels | 22 bp non-homopolymer indels | 25 bp non-homopolymer indels | 26 bp non-homopolymer indels | 32 bp non-homopolymer indels | 51 bp non-homopolymer indels | 106 bp non-homopolymer indels | 458 bp non-homopolymer indels |              |   |
|----------------------------------------|---------------|------------|------------|---------------|-------------------------|-----------------------------|-------------------------|-----------------------------|-------------------------|-----------------------------|-------------------------|-----------------------------|-----------------------------|-----------------------------|-----------------------------|-----------------------------|-----------------------------|------------------------------|------------------------------|------------------------------|------------------------------|------------------------------|------------------------------|------------------------------|------------------------------|------------------------------|------------------------------|------------------------------|------------------------------|------------------------------|------------------------------|------------------------------|------------------------------|------------------------------|-------------------------------|-------------------------------|--------------|---|
| Acinetobacter_baumannii_J9_chromosome  | 3798645       | miniasm    | raven      | 2975          | 670                     | 2507                        | 67                      | 769                         | 8                       | 283                         | 3                       | 148                         | 82                          | 41                          | 22                          | 20                          | 14                          | 10                           | 8                            | 6                            | 7                            | 4                            | 1                            | 1                            | 0                            | 1                            | 3                            | 2                            | 0                            | 1                            | 0                            | 0                            | 0                            | 1                            | 0                             | 1                             |              |   |
| Acinetobacter_baumannii_J9_chromosome  | 3798645       | miniasm    | flye       | 2950          | 968                     | 2335                        | 64                      | 724                         | 8                       | 247                         | 2                       | 133                         | 60                          | 34                          | 16                          | 14                          | 9                           | 4                            | 4                            | 2                            | 3                            | 4                            | 1                            | 1                            | 0                            | 1                            | 1                            | 0                            | 0                            | 0                            | 0                            | 0                            | 0                            | 1                            | 0                             | 0                             |              |   |
| Acinetobacter_baumannii_J9_chromosome  | 3798645       | raven      | flye       | 48            | 804                     | 243                         | 19                      | 88                          | 1                       | 51                          | 1                       | 41                          | 22                          | 16                          | 13                          | 12                          | 10                          | 4                            | 5                            | 1                            | 2                            | 2                            | 2                            | 1                            | 0                            | 0                            | 1                            | 0                            | 3                            | 0                            | 1                            | 0                            | 0                            | 0                            | 0                             | 0                             |              |   |
| Enterobacter_kobei_MSB1_1B_chromosome  | 4837926       | miniasm    | raven      | 215           | 692                     | 1074                        | 36                      | 227                         | 2                       | 56                          | 2                       | 17                          | 5                           | 0                           | 0                           | 1                           | 1                           | 0                            | 0                            | 0                            | 0                            | 1                            | 0                            | 0                            | 0                            | 0                            | 0                            | 0                            | 0                            | 0                            | 0                            | 0                            | 0                            | 0                            | 0                             | 0                             | 0            |   |
| Enterobacter_kobei_MSB1_1B_chromosome  | 4837926       | miniasm    | flye       | 414           | 1159                    | 1037                        | 37                      | 155                         | 2                       | 41                          | 2                       | 12                          | 5                           | 0                           | 0                           | 1                           | 0                           | 0                            | 0                            | 0                            | 0                            | 0                            | 0                            | 0                            | 0                            | 0                            | 0                            | 0                            | 0                            | 0                            | 0                            | 0                            | 0                            | 0                            | 0                             | 0                             | 0            |   |
| Enterobacter_kobei_MSB1_1B_chromosome  | 4837926       | raven      | flye       | 307           | 1101                    | 1008                        | 19                      | 99                          | 2                       | 10                          | 0                       | 7                           | 0                           | 0                           | 0                           | 1                           | 0                           | 0                            | 0                            | 0                            | 0                            | 0                            | 0                            | 0                            | 0                            | 0                            | 0                            | 0                            | 0                            | 0                            | 0                            | 0                            | 0                            | 0                            | 0                             | 0                             | 0            |   |
| Haemophilus_M1C132_1_chromosome        | 2051886       | miniasm    | raven      | 120           | 322                     | 431                         | 66                      | 166                         | 9                       | 48                          | 0                       | 7                           | 3                           | 2                           | 2                           | 2                           | 0                           | 0                            | 0                            | 0                            | 0                            | 1                            | 0                            | 0                            | 0                            | 0                            | 0                            | 0                            | 0                            | 0                            | 0                            | 0                            | 0                            | 0                            | 0                             | 0                             | 0            | 0 |
| Haemophilus_M1C132_1_chromosome        | 2051886       | miniasm    | flye       | 107           | 514                     | 326                         | 43                      | 106                         | 10                      | 28                          | 1                       | 3                           | 1                           | 0                           | 0                           | 0                           | 0                           | 0                            | 0                            | 0                            | 0                            | 0                            | 0                            | 0                            | 0                            | 0                            | 0                            | 0                            | 0                            | 0                            | 0                            | 0                            | 0                            | 0                            | 0                             | 0                             | 0            | 0 |
| Haemophilus_M1C132_1_chromosome        | 2051886       | raven      | flye       | 77            | 480                     | 269                         | 23                      | 99                          | 2                       | 25                          | 0                       | 6                           | 4                           | 2                           | 2                           | 2                           | 0                           | 0                            | 0                            | 0                            | 0                            | 1                            | 0                            | 0                            | 0                            | 0                            | 0                            | 0                            | 0                            | 0                            | 0                            | 0                            | 0                            | 0                            | 0                             | 0                             | 0            | 0 |
| Klebsiella_oxytoca_MSB1_2C_chromosome  | 5804453       | miniasm    | raven      | 796           | 713                     | 1208                        | 37                      | 493                         | 4                       | 219                         | 1                       | 102                         | 61                          | 33                          | 22                          | 12                          | 15                          | 9                            | 0                            | 3                            | 2                            | 2                            | 1                            | 0                            | 1                            | 0                            | 0                            | 0                            | 0                            | 0                            | 0                            | 1                            | 0                            | 0                            | 0                             | 0                             | 0            | 0 |
| Klebsiella_oxytoca_MSB1_2C_chromosome  | 5804453       | miniasm    | flye       | 842           | 1400                    | 1108                        | 47                      | 450                         | 4                       | 207                         | 1                       | 100                         | 56                          | 31                          | 19                          | 9                           | 15                          | 8                            | 0                            | 3                            | 2                            | 2                            | 1                            | 1                            | 0                            | 1                            | 0                            | 0                            | 0                            | 0                            | 0                            | 0                            | 0                            | 0                            | 0                             | 0                             | 0            | 0 |
| Klebsiella_oxytoca_MSB1_2C_chromosome  | 5804453       | raven      | flye       | 71            | 1348                    | 243                         | 31                      | 92                          | 0                       | 17                          | 0                       | 1                           | 8                           | 0                           | 2                           | 2                           | 1                           | 0                            | 0                            | 0                            | 0                            | 1                            | 0                            | 0                            | 0                            | 0                            | 0                            | 0                            | 0                            | 0                            | 0                            | 1                            | 1                            | 0                            | 0                             | 0                             | 0            |   |
| Klebsiella_variicola_INF345_chromosome | 5417034       | miniasm    | raven      | 131           | 805                     | 594                         | 40                      | 179                         | 2                       | 40                          | 0                       | 11                          | 4                           | 0                           | 3                           | 0                           | 0                           | 0                            | 0                            | 0                            | 0                            | 0                            | 0                            | 0                            | 0                            | 0                            | 0                            | 0                            | 0                            | 0                            | 1                            | 0                            | 0                            | 0                            | 0                             | 0                             | 0            |   |
| Klebsiella_variicola_INF345_chromosome | 5417034       | miniasm    | flye       | 285           | 1451                    | 622                         | 35                      | 156                         | 1                       | 29                          | 0                       | 6                           | 2                           | 0                           | 1                           | 0                           | 0                           | 0                            | 0                            | 0                            | 0                            | 0                            | 0                            | 0                            | 0                            | 0                            | 0                            | 0                            | 0                            | 0                            | 0                            | 0                            | 0                            | 0                            | 0                             | 0                             | 0            | 0 |
| Klebsiella_variicola_INF345_chromosome | 5417034       | raven      | flye       | 244           | 1381                    | 454                         | 32                      | 107                         | 0                       | 21                          | 0                       | 6                           | 4                           | 0                           | 4                           | 0                           | 0                           | 0                            | 0                            | 0                            | 0                            | 0                            | 0                            | 0                            | 0                            | 0                            | 0                            | 0                            | 0                            | 1                            | 0                            | 0                            | 0                            | 0                            | 0                             | 0                             | 0            |   |
| <b>Totals:</b>                         |               |            |            | <b>9582</b>   | <b>13808</b>            | <b>13459</b>                | <b>596</b>              | <b>3910</b>                 | <b>55</b>               | <b>1322</b>                 | <b>13</b>               | <b>600</b>                  | <b>317</b>                  | <b>159</b>                  | <b>106</b>                  | <b>75</b>                   | <b>66</b>                   | <b>35</b>                    | <b>17</b>                    | <b>15</b>                    | <b>18</b>                    | <b>16</b>                    | <b>6</b>                     | <b>3</b>                     | <b>2</b>                     | <b>2</b>                     | <b>5</b>                     | <b>2</b>                     | <b>3</b>                     | <b>1</b>                     | <b>3</b>                     | <b>2</b>                     | <b>1</b>                     | <b>1</b>                     | <b>1</b>                      | <b>1</b>                      |              |   |
| <b>Proportions:</b>                    |               |            |            | <b>21.68%</b> | <b>31.24%</b>           | <b>30.45%</b>               | <b>1.35%</b>            | <b>8.85%</b>                | <b>0.12%</b>            | <b>2.99%</b>                | <b>0.03%</b>            | <b>1.36%</b>                | <b>0.72%</b>                | <b>0.36%</b>                | <b>0.24%</b>                | <b>0.17%</b>                | <b>0.15%</b>                | <b>0.08%</b>                 | <b>0.04%</b>                 | <b>0.03%</b>                 | <b>0.04%</b>                 | <b>0.04%</b>                 | <b>0.01%</b>                 | <b>0.01%</b>                 | <b>0.00%</b>                 | <b>0.00%</b>                 | <b>0.01%</b>                 | <b>0.00%</b>                 | <b>0.01%</b>                 | <b>0.00%</b>                 | <b>0.01%</b>                 | <b>0.00%</b>                 | <b>0.00%</b>                 | <b>0.00%</b>                 | <b>0.00%</b>                  | <b>0.00%</b>                  | <b>0.00%</b> |   |
| <b>Rate per Mbp:</b>                   |               |            |            | <b>155.35</b> | <b>210.80</b>           | <b>215.50</b>               | <b>10.83</b>            | <b>63.76</b>                | <b>1.19</b>             | <b>21.15</b>                | <b>0.22</b>             | <b>9.28</b>                 | <b>4.83</b>                 | <b>2.46</b>                 | <b>1.62</b>                 | <b>1.23</b>                 | <b>0.96</b>                 | <b>0.51</b>                  | <b>0.30</b>                  | <b>0.23</b>                  | <b>0.32</b>                  | <b>0.25</b>                  | <b>0.09</b>                  | <b>0.05</b>                  | <b>0.02</b>                  | <b>0.04</b>                  | <b>0.09</b>                  | <b>0.04</b>                  | <b>0.05</b>                  | <b>0.02</b>                  | <b>0.04</b>                  | <b>0.02</b>                  | <b>0.01</b>                  | <b>0.02</b>                  | <b>0.02</b>                   | <b>0.02</b>                   |              |   |

# Tester assemblers

## Assemblers used

|                       |                                                      |
|-----------------------|------------------------------------------------------|
| Trycycler - developer | 3× Flye, 3× Miniasm/Minipolish, 3× Raven, 3× Redbean |
| Trycycler - tester 1  | 3× Flye, 3× Miniasm/Minipolish, 3× Raven, 3× Redbean |
| Trycycler - tester 2  | 3× Flye, 3× Miniasm/Minipolish, 3× Raven, 3× Redbean |
| Trycycler - tester 3  | 4× Flye, 4× Miniasm/Minipolish, 4× Raven             |
| Trycycler - tester 4  | 3× Flye, 3× Miniasm/Minipolish, 3× Raven             |
| Trycycler - tester 5  | 4× Flye, 4× Miniasm/Minipolish, 4× Raven             |
